# Supplementary material
Source: Royal Society of Chemistry journal article supplement (doi:10.1039/d5gc06927k)
Supplement: d5gc06927k1.pdf [file d5gc06927k1.pdf]

# Supporting Information

## Scalable and Sustainable Mechanochemical Deracemisation by Resonant Acoustic Mixing

Job Gieling<sup>+, [a]</sup>, Guillaume Wery<sup>+, [a]</sup>, Zoer El Kaderi<sup>[a]</sup>, Leeroy Hendrickx<sup>[b, c]</sup>, Thomas Wiegand<sup>[b, c]</sup>, Carsten Bolm<sup>[d]</sup>,  
Tom Leyssens<sup>[a]</sup> and Daniel M. Baier<sup>\*, [a]</sup>

\*Corresponding author: [daniel.baier@uclouvain.be](mailto:daniel.baier@uclouvain.be)

---

[a] J. Gieling, G. Wery, Prof. Dr. T. Leyssens, Dr. D. M. Baier; Department of Molecular Chemistry, Materials and Catalysis; Institute of Condensed Matter and Nanosciences; Université Catholique de Louvain; Place Louis Pasteur, 1 bte L4.01.06, 1348 Louvain-La-Neuve (Belgium)

[b] L. Hendrickx, Prof. Dr. T. Wiegand; Max Planck Institute for Chemical Energy Conversion; Stiftstrasse, 34 – 36, 45470 Mülheim an der Ruhr (Germany)

[c] Institute of Technical and Macromolecular Chemistry; RWTH Aachen University, Worringerweg 2, 52074 Aachen (Germany)

[d] Prof. Dr. C. Bolm; Institut für Organische Chemie; RWTH Aachen University; Landoltweg, 1, 52074 Aachen (Germany)

[+] These authors contributed equally

**Table of Contents**

|          |                                                                           |    |
|----------|---------------------------------------------------------------------------|----|
| 1.       | Supplementary Tables.....                                                 | 3  |
| 1.1.     | MCDR-BM: Solvent Screening .....                                          | 3  |
| 1.1.1.   | Compound 1 .....                                                          | 3  |
| 1.1.2.   | Compound 2 .....                                                          | 4  |
| 1.1.3.   | Compound 3 .....                                                          | 5  |
| 1.1.4.   | Supplementary Analysis of the Results .....                               | 5  |
| 1.2.     | MCDR-RAM: Control Experiments .....                                       | 7  |
| 1.2.1.   | Compound 1 .....                                                          | 7  |
| 1.2.2.   | Compound 2 .....                                                          | 7  |
| 1.3.     | MCDR-RAM: Solvent and Scale-up Effect .....                               | 8  |
| 1.3.1.   | Compound 1 .....                                                          | 8  |
| 1.3.2.   | Compound 2 .....                                                          | 10 |
| 1.3.3.   | Compound 3 .....                                                          | 11 |
| 2.       | Experimental Section.....                                                 | 12 |
| 2.1.     | General Information .....                                                 | 12 |
| 2.1.1.   | Materials .....                                                           | 12 |
| 2.1.2.   | Devices .....                                                             | 12 |
| 2.2.     | Experimental Protocols.....                                               | 14 |
| 2.2.1.   | Preparation of Enantioenriched ( <i>ee</i> = 20%) Starting Materials..... | 14 |
| 2.2.2.   | Synthesis of Starting Materials .....                                     | 14 |
| 2.2.2.1. | Synthesis of Compound 1 .....                                             | 14 |
| 2.2.2.2. | Synthesis of Compounds 2 and 3.....                                       | 15 |
| 2.2.3.   | Mechanochemical Deracemization (MCDR).....                                | 16 |
| 2.2.3.1. | MCDR by Ball-Milling (MCDR-BM).....                                       | 16 |
| 2.2.3.1. | MCDR by Resonance Acoustic Mixing (MCDR-RAM) .....                        | 17 |
| 2.3.     | Solubility Determination .....                                            | 17 |
| 3.       | Characterization .....                                                    | 19 |
| 3.1.     | <sup>1</sup> H-NMR-Spectra .....                                          | 19 |
| 3.2.     | XRPD Analysis .....                                                       | 22 |
| 3.3.     | HPLC Analysis.....                                                        | 23 |
| 4.       | References .....                                                          | 28 |

## 1. Supplementary Tables

### 1.1. MCDR-BM: Solvent Screening

#### 1.1.1. Compound 1

**Table S1:** Parameters of solvent screening for the MCDR-BM of compound 1. The reactions were carried out at a milling frequency of 30 Hz (Tol: Toluene; Hex: *n*-Hexane).

| $m_{\text{imine}}$ [g] | Initial ee | DBU (equiv.) | $m_{\text{NaCl}}$ [g] | LAG  | $V_{\text{Solvent}}$ [ $\mu\text{L}$ ] | $\eta$ [ $\mu\text{L}/\text{mg}$ ] | Jar Material     | Final ee | Time   |
|------------------------|------------|--------------|-----------------------|------|----------------------------------------|------------------------------------|------------------|----------|--------|
| 0.20                   | 20%        | 0.66         | 6.3                   | Tol  | 108                                    | 0.023                              | ZrO <sub>2</sub> | 30%      | 90 min |
| 0.20                   | 20%        | 0.66         | 6.3                   | MeCN | 108                                    | 0.023                              | ZrO <sub>2</sub> | 49%      | 90 min |
| 0.20                   | 20%        | 0.66         | 6.3                   | Hex  | 108                                    | 0.023                              | ZrO <sub>2</sub> | 44%      | 90 min |
| 0.20                   | 20%        | 0.66         | 6.3                   | MeOH | 108                                    | 0.023                              | ZrO <sub>2</sub> | 49%      | 90 min |
| 0.20                   | 20%        | 0.66         | 6.3                   | DCM  | 108                                    | 0.023                              | ZrO <sub>2</sub> | 37%      | 90 min |
| 0.20                   | 20%        | 0.66         | 6.3                   | Tol  | 1000                                   | 0.21                               | ZrO <sub>2</sub> | 17%      | 90 min |
| 0.20                   | 20%        | 0.66         | 6.3                   | MeCN | 1,000                                  | 0.21                               | ZrO <sub>2</sub> | 73%      | 90 min |
| 0.20                   | 20%        | 0.66         | 6.3                   | Hex  | 1,000                                  | 0.21                               | ZrO <sub>2</sub> | 29%      | 90 min |
| 0.20                   | 20%        | 0.66         | 6.3                   | MeOH | 1,000                                  | 0.21                               | ZrO <sub>2</sub> | 32%      | 90 min |
| 0.20                   | 20%        | 0.66         | 6.3                   | DCM  | 1,000                                  | 0.21                               | ZrO <sub>2</sub> | 61%      | 90 min |
| 0.28                   | 20%        | 0.66         | 6.3                   | Tol  | 150                                    | 0.023                              | PTFE             | 44%      | 90 min |
| 0.28                   | 20%        | 0.66         | 6.3                   | MeCN | 150                                    | 0.023                              | PTFE             | 66%      | 90 min |
| 0.28                   | 20%        | 0.66         | 6.3                   | Hex  | 150                                    | 0.023                              | PTFE             | 37%      | 90 min |
| 0.28                   | 20%        | 0.66         | 6.3                   | MeOH | 150                                    | 0.023                              | PTFE             | 38%      | 90 min |
| 0.28                   | 20%        | 0.66         | 6.3                   | DCM  | 150                                    | 0.023                              | PTFE             | 57%      | 90 min |
| 0.28                   | 20%        | 0.66         | 6.3                   | Tol  | 1,400                                  | 0.21                               | PTFE             | 24%      | 90 min |
| 0.28                   | 20%        | 0.66         | 6.3                   | MeCN | 1,400                                  | 0.21                               | PTFE             | 64%      | 90 min |
| 0.28                   | 20%        | 0.66         | 6.3                   | Hex  | 1,400                                  | 0.21                               | PTFE             | 34%      | 90 min |
| 0.28                   | 20%        | 0.66         | 6.3                   | MeOH | 1,400                                  | 0.21                               | PTFE             | 23%      | 90 min |
| 0.28                   | 20%        | 0.66         | 6.3                   | DCM  | 1,400                                  | 0.21                               | PTFE             | 66%      | 90 min |
| 0.28                   | 0%         | 0.66         | 6.3                   | Tol  | 150                                    | 0.023                              | PTFE             | 13%      | 17 h   |
| 0.28                   | 0%         | 0.66         | 6.3                   | MeCN | 150                                    | 0.023                              | PTFE             | 84%      | 17 h   |
| 0.28                   | 0%         | 0.66         | 6.3                   | MeCN | 1000                                   | 0.21                               | ZrO <sub>2</sub> | 2%       | 17 h   |

### 1.1.2. Compound 2

**Table S2:** Parameters of solvent screening for the MCDR-BM of compound **2**. The reactions were carried out at a milling frequency of 30 Hz (Tol: Toluene; Hex: *n*-Hexane).

| $m_{\text{imine}}$ [g] | Initial ee | DBU (equiv.) | $m_{\text{NaCl}}$ [g] | LAG  | $V_{\text{Solvent}}$ [ $\mu\text{L}$ ] | $\eta$ [ $\mu\text{L}/\text{mg}$ ] | Jar Material     | Final ee | Time   |
|------------------------|------------|--------------|-----------------------|------|----------------------------------------|------------------------------------|------------------|----------|--------|
| 0.20                   | 20%        | 0.3          | 6.3                   | Tol  | 108                                    | 0.023                              | ZrO <sub>2</sub> | 73%      | 90 min |
| 0.20                   | 20%        | 0.3          | 6.3                   | MeCN | 108                                    | 0.023                              | ZrO <sub>2</sub> | 83%      | 90 min |
| 0.20                   | 20%        | 0.3          | 6.3                   | Hex  | 108                                    | 0.023                              | ZrO <sub>2</sub> | 60%      | 90 min |
| 0.20                   | 20%        | 0.3          | 6.3                   | MeOH | 108                                    | 0.023                              | ZrO <sub>2</sub> | 74%      | 90 min |
| 0.20                   | 20%        | 0.3          | 6.3                   | DCM  | 108                                    | 0.023                              | ZrO <sub>2</sub> | 54%      | 90 min |
| 0.20                   | 20%        | 0.3          | 6.3                   | Tol  | 1,000                                  | 0.21                               | ZrO <sub>2</sub> | 32%      | 90 min |
| 0.20                   | 20%        | 0.3          | 6.3                   | MeCN | 1,000                                  | 0.21                               | ZrO <sub>2</sub> | 74%      | 90 min |
| 0.20                   | 20%        | 0.3          | 6.3                   | Hex  | 1,000                                  | 0.21                               | ZrO <sub>2</sub> | 37%      | 90 min |
| 0.20                   | 20%        | 0.3          | 6.3                   | MeOH | 1,000                                  | 0.21                               | ZrO <sub>2</sub> | 2%       | 90 min |
| 0.20                   | 20%        | 0.3          | 6.3                   | DCM  | 1,000                                  | 0.21                               | ZrO <sub>2</sub> | 1%       | 90 min |
| 0.28                   | 20%        | 0.3          | 6.3                   | Tol  | 150                                    | 0.023                              | PTFE             | 47%      | 90 min |
| 0.28                   | 20%        | 0.3          | 6.3                   | MeCN | 150                                    | 0.023                              | PTFE             | 86%      | 90 min |
| 0.28                   | 20%        | 0.3          | 6.3                   | Hex  | 150                                    | 0.023                              | PTFE             | 50%      | 90 min |
| 0.28                   | 20%        | 0.3          | 6.3                   | MeOH | 150                                    | 0.023                              | PTFE             | 66%      | 90 min |
| 0.28                   | 20%        | 0.3          | 6.3                   | DCM  | 150                                    | 0.023                              | PTFE             | 45%      | 90 min |
| 0.28                   | 20%        | 0.3          | 6.3                   | Tol  | 1,400                                  | 0.21                               | PTFE             | 36%      | 90 min |
| 0.28                   | 20%        | 0.3          | 6.3                   | MeCN | 1,400                                  | 0.21                               | PTFE             | 56%      | 90 min |
| 0.28                   | 20%        | 0.3          | 6.3                   | Hex  | 1,400                                  | 0.21                               | PTFE             | 55%      | 90 min |
| 0.28                   | 20%        | 0.3          | 6.3                   | MeOH | 1,400                                  | 0.21                               | PTFE             | 3%       | 90 min |
| 0.28                   | 20%        | 0.3          | 6.3                   | DCM  | 1,400                                  | 0.21                               | PTFE             | 0%       | 90 min |
| 0.28                   | 0%         | 0.3          | 6.3                   | MeCN | 150                                    | 0.023                              | PTFE             | 85%      | 24 h   |
| 0.28                   | 0%         | 0.3          | 6.3                   | MeCN | 150                                    | 0.023                              | PTFE             | 82%      | 24 h   |

### 1.1.3. Compound 3

**Table S3:** Parameters of solvent screening for the MCDR-BM of compound **3**. The reactions were carried out at a milling frequency of 30 Hz (Tol: Toluene; Hex: *n*-Hexane).

| $m_{\text{imine}}$ [g] | Initial ee | DBU (equiv.) | $m_{\text{NaCl}}$ [g] | LAG  | $V_{\text{Solvent}}$ [ $\mu\text{L}$ ] | $\eta$ [ $\mu\text{L}/\text{mg}$ ] | Jar Material     | Final ee | Time   |
|------------------------|------------|--------------|-----------------------|------|----------------------------------------|------------------------------------|------------------|----------|--------|
| 0.20                   | 20%        | 0.3          | 6.3                   | Tol  | 108                                    | 0.023                              | ZrO <sub>2</sub> | 33%      | 90 min |
| 0.20                   | 20%        | 0.3          | 6.3                   | MeCN | 108                                    | 0.023                              | ZrO <sub>2</sub> | 33%      | 90 min |
| 0.20                   | 20%        | 0.3          | 6.3                   | Hex  | 108                                    | 0.023                              | ZrO <sub>2</sub> | 33%      | 90 min |
| 0.20                   | 20%        | 0.3          | 6.3                   | MeOH | 108                                    | 0.023                              | ZrO <sub>2</sub> | 30%      | 90 min |
| 0.20                   | 20%        | 0.3          | 6.3                   | DCM  | 108                                    | 0.023                              | ZrO <sub>2</sub> | 33%      | 90 min |
| 0.20                   | 20%        | 0.3          | 6.3                   | Tol  | 1,000                                  | 0.21                               | ZrO <sub>2</sub> | 27%      | 90 min |
| 0.20                   | 20%        | 0.3          | 6.3                   | MeCN | 1,000                                  | 0.21                               | ZrO <sub>2</sub> | 36%      | 90 min |
| 0.20                   | 20%        | 0.3          | 6.3                   | Hex  | 1,000                                  | 0.21                               | ZrO <sub>2</sub> | 33%      | 90 min |
| 0.20                   | 20%        | 0.3          | 6.3                   | MeOH | 1,000                                  | 0.21                               | ZrO <sub>2</sub> | 15%      | 90 min |
| 0.20                   | 20%        | 0.3          | 6.3                   | DCM  | 1,000                                  | 0.21                               | ZrO <sub>2</sub> | 2%       | 90 min |
| 0.28                   | 20%        | 0.3          | 6.3                   | Tol  | 150                                    | 0.023                              | PTFE             | 48%      | 90 min |
| 0.28                   | 20%        | 0.3          | 6.3                   | MeCN | 150                                    | 0.023                              | PTFE             | 48%      | 90 min |
| 0.28                   | 20%        | 0.3          | 6.3                   | Hex  | 150                                    | 0.023                              | PTFE             | 42%      | 90 min |
| 0.28                   | 20%        | 0.3          | 6.3                   | MeOH | 150                                    | 0.023                              | PTFE             | 28%      | 90 min |
| 0.28                   | 20%        | 0.3          | 6.3                   | DCM  | 150                                    | 0.023                              | PTFE             | 40%      | 90 min |
| 0.28                   | 20%        | 0.3          | 6.3                   | Tol  | 1,400                                  | 0.21                               | PTFE             | 32%      | 90 min |
| 0.28                   | 20%        | 0.3          | 6.3                   | MeCN | 1,400                                  | 0.21                               | PTFE             | 35%      | 90 min |
| 0.28                   | 20%        | 0.3          | 6.3                   | Hex  | 1,400                                  | 0.21                               | PTFE             | 31%      | 90 min |
| 0.28                   | 20%        | 0.3          | 6.3                   | MeOH | 1,400                                  | 0.21                               | PTFE             | 20%      | 90 min |
| 0.28                   | 20%        | 0.3          | 6.3                   | DCM  | 1,400                                  | 0.21                               | PTFE             | 2%       | 90 min |
| 0.28                   | 0%         | 0.3          | 6.3                   | MeCN | 150                                    | 0.023                              | PTFE             | 74%      | 48 h   |

### 1.1.4. Supplementary Analysis of the Results

Across all three systems, *n*-hexane consistently gave the lowest enantiomeric excess (ee). The highest ee of 60% was obtained for compound **2** in a ZrO<sub>2</sub> jar at  $\eta = 0.023 \mu\text{L}/\text{mg}$ , while at  $\eta = 0.21 \mu\text{L}/\text{mg}$ , the ee dropped to 50%. Most other experiments, including those with compounds **1** and **3**, did not exceed 45% ee under comparable conditions. Methanol produced only moderate results, with compound **1** giving 23–49% ee and compound **3** showing slightly lower values (15–30% ee). Remarkably, for compound **2** at high  $\eta$ , complete racemization occurred in both ZrO<sub>2</sub> and PTFE jars, whereas at low  $\eta$ , the outcome completely reversed, giving 74% ee in ZrO<sub>2</sub> and 66% ee in PTFE—the best results obtained with MeOH. DCM gave an overall improvement over MeOH for compound **1** (37–66% ee); however, as with MeOH, compounds **2** and **3** underwent complete racemization at high  $\eta$ . At low  $\eta$ , ee values ranged from 33% to 54%. Toluene led to the second-highest enantioenrichment. From our previous work, we already knew that toluene performed well for compound **2**—for example, ZrO<sub>2</sub> at low  $\eta$  gave 73% ee. However, for compounds **1** and **3**, the results remained moderate (17–48% ee). Finally, the highest enantioenrichment was achieved with MeCN as the LAG-additive. Consistent with our earlier findings, MeCN performed efficiently for compound **1**, giving 49–73% ee, with the ZrO<sub>2</sub> jar at low  $\eta$  being the only case below 64% ee. Although compound **3** remained difficult to deracemize (27–48% ee), compound **2** displayed a notable improvement compared to

toluene. Apart from PTFE at high  $\eta$ , compound **2** consistently afforded *ee* values above 80% (83–86% *ee*) using MeCN as the LAG-additive, confirming MeCN's superior performance under solvent-minimized mechanochemical conditions.

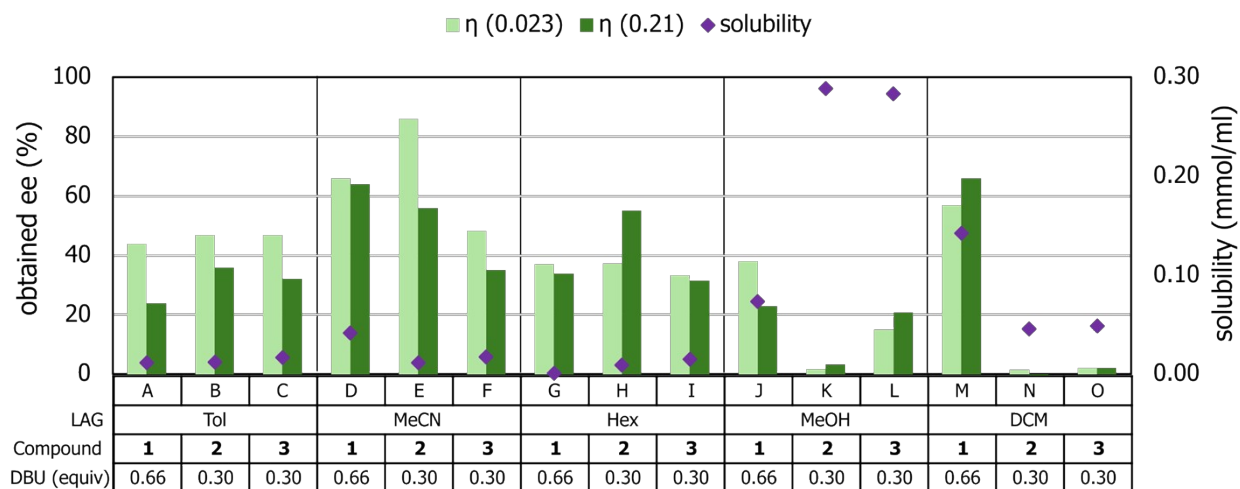

**Figure S1** *ee* obtained for compounds **1**, **2**, and **3** from an enantioenriched mixture (20%), combined with their solubility (mmol/mL) in the respective LAG-additive under BM conditions. The table below lists, from top to bottom: LAG-additive, compound, and DBU equivalents. PTFE jars (14 mL) were charged with imine (280 mg, 20% *ee*), NaCl (6.3 g), LAG-additive ( $\eta = 0.023 \mu\text{L}/\text{mg}$ , 150  $\mu\text{L}$ ;  $\eta = 0.21 \mu\text{L}/\text{mg}$ , 1400  $\mu\text{L}$ ) and ZrO<sub>2</sub> balls (3x10 mm) and milled at 30 Hz for 1.5 h.

## 1.2. MCDR-RAM: Control Experiments

### 1.2.1. Compound 1

**Table S4:** Parameters of control experiment for the MCDR-RAM of compound 1. The reactions were carried out at an acceleration of 100 g (Tol: Toluene).

| $m_{\text{Imine}}$ [g] | Initial ee | DBU (equiv.) | $m_{\text{NaCl}}$ [g] | LARAM | $V_{\text{Solvent}}$ [ $\mu\text{L}$ ] | $\eta$ [ $\mu\text{L}/\text{mg}$ ] | Jar size (ml) | Final ee | Time   |
|------------------------|------------|--------------|-----------------------|-------|----------------------------------------|------------------------------------|---------------|----------|--------|
| 0.14                   | 25%        | 0.66         | 3.15                  | -     | -                                      | -                                  | 5             | 40%      | 90 min |
| 0.14                   | 25%        | 0.66         | -                     | Tol   | 75                                     | 0.54                               | 5             | 15%      | 90 min |
| 0.14                   | 25%        | 0.66         | -                     | MeCN  | 75                                     | 0.54                               | 5             | 31%      | 90 min |

### 1.2.2. Compound 2

**Table S5:** Parameters of control experiment for the MCDR-RAM of compound 2. The reactions were carried out at an acceleration of 100 g (Tol: Toluene).

| $m_{\text{Imine}}$ [g] | Initial ee | DBU (equiv.) | $m_{\text{NaCl}}$ [g] | LARAM | $V_{\text{Solvent}}$ [ $\mu\text{L}$ ] | $\eta$ [ $\mu\text{L}/\text{mg}$ ] | Jar size (ml) | Final ee | Time   |
|------------------------|------------|--------------|-----------------------|-------|----------------------------------------|------------------------------------|---------------|----------|--------|
| 0.14                   | 20%        | 0.30         | 3.15                  | -     | -                                      | -                                  | 5             | 32%      | 90 min |
| 0.14                   | 20%        | 0.30         | -                     | Tol   | 75                                     | 0.54                               | 5             | 11%      | 90 min |
| 0.14                   | 20%        | 0.30         | -                     | MeCN  | 75                                     | 0.54                               | 5             | 49%      | 90 min |

### 1.3. MCDR-RAM: Solvent and Scale-up Effect

#### 1.3.1. Compound 1

**Table S6:** Parameters used in the solvent- and scale-up study of MCDR-RAM of compound 1. The reactions were carried out at an acceleration of 100 g (Tol: Toluene). Starting from 0% ee, the enantiomer enriched is mentioned between brackets.

| $m_{\text{imine}}$ [g] | Initial ee | DBU (equiv.) | $m_{\text{NaCl}}$ [g] | LARAM | $V_{\text{Solvent}}$ [ $\mu\text{L}$ ] | $\eta$ [ $\mu\text{L}/\text{mg}$ ] | Jar size (ml) | Final ee         | Time    |
|------------------------|------------|--------------|-----------------------|-------|----------------------------------------|------------------------------------|---------------|------------------|---------|
| 0.14                   | 25%        | 0.66         | 3.15                  | Tol   | 75                                     | 0.02                               | 5             | 74%              | 90 min  |
| 0.14                   | 25%        | 0.66         | 3.15                  | Tol   | 75                                     | 0.02                               | 5             | 89%              | 90 min  |
| 0.14                   | 25%        | 0.66         | 3.15                  | Tol   | 75                                     | 0.02                               | 5             | 82%              | 90 min  |
| 0.14                   | 25%        | 0.66         | 3.15                  | MeCN  | 75                                     | 0.02                               | 5             | 84%              | 90 min  |
| 0.14                   | 25%        | 0.66         | 3.15                  | MeCN  | 75                                     | 0.02                               | 5             | 85%              | 90 min  |
| 0.14                   | 25%        | 0.66         | 3.15                  | MeCN  | 75                                     | 0.02                               | 5             | 78%              | 90 min  |
| 0.14                   | 25%        | 0.66         | 3.15                  | MeCN  | 75                                     | 0.02                               | 5             | 91%              | 180 min |
| 0.14                   | 25%        | 0.66         | 3.15                  | MeCN  | 75                                     | 0.02                               | 5             | 89%              | 180 min |
| 0.14                   | 25%        | 0.66         | 3.15                  | MeCN  | 75                                     | 0.02                               | 5             | 50% <sup>1</sup> | 180 min |
| 0.14                   | 25%        | 0.66         | 3.15                  | Tol   | 700                                    | 0.21                               | 5             | 67%              | 90 min  |
| 0.14                   | 25%        | 0.66         | 3.15                  | Tol   | 700                                    | 0.21                               | 5             | 86%              | 90 min  |
| 0.14                   | 25%        | 0.66         | 3.15                  | Tol   | 700                                    | 0.21                               | 5             | 77%              | 90 min  |
| 0.14                   | 25%        | 0.66         | 3.15                  | MeCN  | 700                                    | 0.21                               | 5             | 83%              | 90 min  |
| 0.14                   | 25%        | 0.66         | 3.15                  | MeCN  | 700                                    | 0.21                               | 5             | 29%              | 90 min  |
| 0.14                   | 25%        | 0.66         | 3.15                  | MeCN  | 700                                    | 0.21                               | 5             | 0%               | 90 min  |
| 0.70                   | 25%        | 0.66         | 15.75                 | Tol   | 375                                    | 0.02                               | 25            | 79%              | 90 min  |
| 0.70                   | 25%        | 0.66         | 15.75                 | Tol   | 375                                    | 0.02                               | 25            | 85%              | 90 min  |
| 0.70                   | 25%        | 0.66         | 15.75                 | Tol   | 375                                    | 0.02                               | 25            | 89% <sup>2</sup> | 90 min  |
| 0.70                   | 25%        | 0.66         | 15.75                 | Tol   | 1700                                   | 0.10                               | 25            | 83%              | 90 min  |
| 0.70                   | 25%        | 0.66         | 15.75                 | Tol   | 1700                                   | 0.10                               | 25            | 85%              | 90 min  |
| 0.70                   | 25%        | 0.66         | 15.75                 | Tol   | 1700                                   | 0.10                               | 25            | 88%              | 90 min  |
| 0.70                   | 25%        | 0.66         | 15.75                 | Tol   | 3500                                   | 0.21                               | 25            | 75%              | 90 min  |
| 0.70                   | 25%        | 0.66         | 15.75                 | Tol   | 3500                                   | 0.21                               | 25            | 55%              | 90 min  |
| 0.70                   | 25%        | 0.66         | 15.75                 | Tol   | 3500                                   | 0.21                               | 25            | 91%              | 90 min  |
| 0.70                   | 25%        | 0.66         | 15.75                 | MeCN  | 375                                    | 0.02                               | 25            | 82%              | 90 min  |
| 0.70                   | 25%        | 0.66         | 15.75                 | MeCN  | 375                                    | 0.02                               | 25            | 84%              | 90 min  |
| 0.70                   | 25%        | 0.66         | 15.75                 | MeCN  | 375                                    | 0.02                               | 25            | 85%              | 90 min  |
| 0.70                   | 25%        | 0.66         | 15.75                 | MeCN  | 292.6                                  | 0.02                               | 25            | 86%              | 90 min  |
|                        |            |              |                       | Tol   | 82.4                                   |                                    |               |                  |         |
| 0.70                   | 25%        | 0.66         | 15.75                 | MeCN  | 292.6                                  | 0.02                               | 25            | 85%              | 90 min  |
|                        |            |              |                       | Tol   | 82.4                                   |                                    |               |                  |         |
| 0.70                   | 25%        | 0.66         | 15.75                 | MeCN  | 292.6                                  | 0.02                               | 25            | 87%              | 90 min  |
|                        |            |              |                       | Tol   | 82.4                                   |                                    |               |                  |         |

<sup>1</sup> Jar broke during the experiment.

<sup>2</sup> HPLC (retention time, min): 12.7, 18.4 (Figure S11).

|      |     |      |       |      |     |      |    |         |        |
|------|-----|------|-------|------|-----|------|----|---------|--------|
| 0.70 | 0%  | 0.66 | 15.75 | MeCN | 375 | 0.02 | 25 | 73% (S) | 90 min |
| 0.70 | 0%  | 0.66 | 15.75 | Tol  | 375 | 0.02 | 25 | 4%      | 90 min |
| 0.70 | 0%  | 0.66 | 15.75 | Tol  | 375 | 0.02 | 25 | 78% (S) | 90 min |
| 0.14 | 0%  | 0.66 | 3.15  | Tol  | 75  | 0.02 | 5  | 1%      | 17 h   |
| 0.14 | 0%  | 0.66 | 3.15  | Tol  | 75  | 0.02 | 5  | 3%      | 17 h   |
| 0.14 | 0%  | 0.66 | 3.15  | Tol  | 75  | 0.02 | 5  | 1%      | 17 h   |
| 0.14 | 0%  | 0.66 | 3.15  | MeCN | 75  | 0.02 | 5  | 14% (S) | 17 h   |
| 0.14 | 0%  | 0.66 | 3.15  | MeCN | 75  | 0.02 | 5  | 18% (S) | 17 h   |
| 0.14 | 0%  | 0.66 | 3.15  | MeCN | 75  | 0.02 | 5  | 50% (S) | 17 h   |
| 0.14 | 0%  | 0.66 | 3.15  | Tol  | 700 | 0.21 | 5  | 0%      | 17 h   |
| 0.14 | 0%  | 0.66 | 3.15  | Tol  | 700 | 0.21 | 5  | 0%      | 17 h   |
| 0.14 | 0%  | 0.66 | 3.15  | Tol  | 700 | 0.21 | 5  | 0%      | 17 h   |
| 0.14 | 0%  | 0.66 | 3.15  | MeCN | 700 | 0.21 | 5  | 17% (R) | 17 h   |
| 0.14 | 0%  | 0.66 | 3.15  | MeCN | 700 | 0.21 | 5  | 18% (S) | 17 h   |
| 0.14 | 0%  | 0.66 | 3.15  | MeCN | 700 | 0.21 | 5  | 86% (R) | 17 h   |
| 0.70 | 50% | 0.66 | 15.75 | Tol  | 375 | 0.02 | 25 | 88%     | 90 min |
| 0.70 | 50% | 0.66 | 15.75 | Tol  | 375 | 0.02 | 25 | 89%     | 90 min |
| 0.70 | 50% | 0.66 | 15.75 | Tol  | 375 | 0.02 | 25 | 89%     | 90 min |
| 0.70 | 50% | 0.66 | 15.75 | MeCN | 375 | 0.02 | 25 | 87%     | 90 min |
| 0.70 | 50% | 0.66 | 15.75 | MeCN | 375 | 0.02 | 25 | 88%     | 90 min |
| 0.70 | 50% | 0.66 | 15.75 | MeCN | 375 | 0.02 | 25 | 93%     | 90 min |
| 0.70 | 75% | 0.66 | 15.75 | Tol  | 375 | 0.02 | 25 | 90%     | 90 min |
| 0.70 | 75% | 0.66 | 15.75 | Tol  | 375 | 0.02 | 25 | 83%     | 90 min |
| 0.70 | 75% | 0.66 | 15.75 | Tol  | 375 | 0.02 | 25 | 84%     | 90 min |
| 0.70 | 75% | 0.66 | 15.75 | MeCN | 375 | 0.02 | 25 | 81%     | 90 min |
| 0.70 | 75% | 0.66 | 15.75 | MeCN | 375 | 0.02 | 25 | 92%     | 90 min |
| 0.70 | 75% | 0.66 | 15.75 | MeCN | 375 | 0.02 | 25 | 89%     | 90 min |
| 0.70 | 25% | 0.66 | 15.75 | Tol  | 375 | 0.02 | 25 | 76%     | 15 min |
| 0.70 | 25% | 0.66 | 15.75 | Tol  | 375 | 0.02 | 25 | 71%     | 15 min |
| 0.70 | 25% | 0.66 | 15.75 | Tol  | 375 | 0.02 | 25 | 77%     | 15 min |
| 0.70 | 25% | 0.66 | 15.75 | Tol  | 375 | 0.02 | 25 | 66%     | 30 min |
| 0.70 | 25% | 0.66 | 15.75 | Tol  | 375 | 0.02 | 25 | 79%     | 30 min |
| 0.70 | 25% | 0.66 | 15.75 | Tol  | 375 | 0.02 | 25 | 77%     | 30 min |
| 0.70 | 25% | 0.66 | 15.75 | Tol  | 375 | 0.02 | 25 | 81%     | 60 min |
| 0.70 | 25% | 0.66 | 15.75 | Tol  | 375 | 0.02 | 25 | 76%     | 60 min |
| 0.70 | 25% | 0.66 | 15.75 | Tol  | 375 | 0.02 | 25 | 77%     | 60 min |

### 1.3.2. Compound 2

**Table S7:** Parameters used in the solvent- and scale-up study of MCDR-RAM of compound 2. The reactions were carried out at an acceleration of 100 g (Tol: Toluene). Starting from 0% ee, the enantiomer enriched is mentioned between brackets.

| $m_{\text{imine}}$ [g] | Initial ee | DBU (equiv.) | $m_{\text{NaCl}}$ [g] | LARAM | $V_{\text{Solvent}}$ [ $\mu\text{L}$ ] | $\eta$ [ $\mu\text{L}/\text{mg}$ ] | Jar size (ml) | Final ee         | Time   |
|------------------------|------------|--------------|-----------------------|-------|----------------------------------------|------------------------------------|---------------|------------------|--------|
| 0.14                   | 20%        | 0.3          | 3.15                  | Tol   | 75                                     | 0.02                               | 5             | 65%              | 90 min |
| 0.14                   | 20%        | 0.3          | 3.15                  | Tol   | 75                                     | 0.02                               | 5             | 29%              | 90 min |
| 0.14                   | 20%        | 0.3          | 3.15                  | Tol   | 75                                     | 0.02                               | 5             | 18%              | 90 min |
| 0.14                   | 20%        | 0.3          | 3.15                  | MeCN  | 75                                     | 0.02                               | 5             | 1%               | 90 min |
| 0.14                   | 20%        | 0.3          | 3.15                  | MeCN  | 75                                     | 0.02                               | 5             | 12%              | 90 min |
| 0.14                   | 20%        | 0.3          | 3.15                  | MeCN  | 75                                     | 0.02                               | 5             | 12%              | 90 min |
| 0.14                   | 20%        | 0.3          | 3.15                  | Tol   | 700                                    | 0.21                               | 5             | 45%              | 90 min |
| 0.14                   | 20%        | 0.3          | 3.15                  | Tol   | 700                                    | 0.21                               | 5             | 66%              | 90 min |
| 0.14                   | 20%        | 0.3          | 3.15                  | Tol   | 700                                    | 0.21                               | 5             | 0%               | 90 min |
| 0.14                   | 20%        | 0.3          | 3.15                  | MeCN  | 700                                    | 0.21                               | 5             | 16%              | 90 min |
| 0.14                   | 20%        | 0.3          | 3.15                  | MeCN  | 700                                    | 0.21                               | 5             | 2%               | 90 min |
| 0.14                   | 20%        | 0.3          | 3.15                  | MeCN  | 700                                    | 0.21                               | 5             | 5%               | 90 min |
| 0.70                   | 20%        | 0.3          | 15.75                 | Tol   | 375                                    | 0.02                               | 25            | 88% <sup>3</sup> | 90 min |
| 0.70                   | 20%        | 0.3          | 15.75                 | Tol   | 375                                    | 0.02                               | 25            | 84%              | 90 min |
| 0.70                   | 20%        | 0.3          | 15.75                 | Tol   | 375                                    | 0.02                               | 25            | 84%              | 90 min |
| 0.70                   | 20%        | 0.3          | 15.75                 | MeCN  | 375                                    | 0.02                               | 25            | 0%               | 90 min |
| 0.70                   | 20%        | 0.3          | 15.75                 | MeCN  | 375                                    | 0.02                               | 25            | 1%               | 90 min |
| 0.70                   | 20%        | 0.3          | 15.75                 | MeCN  | 375                                    | 0.02                               | 25            | 1%               | 90 min |
| 0.14                   | 0%         | 0.3          | 3.15                  | Tol   | 75                                     | 0.02                               | 5             | 28% (S)          | 17 h   |
| 0.14                   | 0%         | 0.3          | 3.15                  | Tol   | 75                                     | 0.02                               | 5             | 19% (S)          | 17 h   |
| 0.14                   | 0%         | 0.3          | 3.15                  | Tol   | 75                                     | 0.02                               | 5             | 35% (S)          | 17 h   |
| 0.14                   | 0%         | 0.3          | 3.15                  | MeCN  | 75                                     | 0.02                               | 5             | 11% (S)          | 17 h   |
| 0.14                   | 0%         | 0.3          | 3.15                  | MeCN  | 75                                     | 0.02                               | 5             | 4%               | 17 h   |
| 0.14                   | 0%         | 0.3          | 3.15                  | MeCN  | 75                                     | 0.02                               | 5             | 3%               | 17 h   |

<sup>3</sup> HPLC (retention time, min): 7.6, 10.5 (Figure S12).

### 1.3.3. Compound 3

**Table S8:** Parameters used in the solvent- and scale-up study of MCDR-RAM of compound **3**. The reactions were carried out at an acceleration of 100 g (Tol: Toluene). Starting from 0% ee, the enantiomer enriched is mentioned between brackets.

| $m_{\text{imine}}$ [g] | Initial ee | DBU (equiv.) | $m_{\text{NaCl}}$ [g] | LARAM | $V_{\text{Solvent}}$ [ $\mu\text{L}$ ] | $\eta$ [ $\mu\text{L}/\text{mg}$ ] | Jar size (ml) | Final ee         | Time   |
|------------------------|------------|--------------|-----------------------|-------|----------------------------------------|------------------------------------|---------------|------------------|--------|
| 0.14                   | 20%        | 0.3          | 3.15                  | Tol   | 75                                     | 0.02                               | 5             | 1%               | 90 min |
| 0.14                   | 20%        | 0.3          | 3.15                  | Tol   | 75                                     | 0.02                               | 5             | 10%              | 90 min |
| 0.14                   | 20%        | 0.3          | 3.15                  | Tol   | 75                                     | 0.02                               | 5             | 17%              | 90 min |
| 0.14                   | 20%        | 0.3          | 3.15                  | MeCN  | 75                                     | 0.02                               | 5             | 3%               | 90 min |
| 0.14                   | 20%        | 0.3          | 3.15                  | MeCN  | 75                                     | 0.02                               | 5             | 1%               | 90 min |
| 0.14                   | 20%        | 0.3          | 3.15                  | MeCN  | 75                                     | 0.02                               | 5             | 12%              | 90 min |
| 0.14                   | 20%        | 0.3          | 3.15                  | Tol   | 700                                    | 0.21                               | 5             | 1%               | 90 min |
| 0.14                   | 20%        | 0.3          | 3.15                  | Tol   | 700                                    | 0.21                               | 5             | 1%               | 90 min |
| 0.14                   | 20%        | 0.3          | 3.15                  | Tol   | 700                                    | 0.21                               | 5             | 8%               | 90 min |
| 0.14                   | 20%        | 0.3          | 3.15                  | MeCN  | 700                                    | 0.21                               | 5             | 1%               | 90 min |
| 0.14                   | 20%        | 0.3          | 3.15                  | MeCN  | 700                                    | 0.21                               | 5             | 1%               | 90 min |
| 0.14                   | 20%        | 0.3          | 3.15                  | MeCN  | 700                                    | 0.21                               | 5             | 2%               | 90 min |
| 0.70                   | 20%        | 0.3          | 15.75                 | Tol   | 375                                    | 0.02                               | 25            | 83% <sup>4</sup> | 90 min |
| 0.70                   | 20%        | 0.3          | 15.75                 | Tol   | 375                                    | 0.02                               | 25            | 82%              | 90 min |
| 0.70                   | 20%        | 0.3          | 15.75                 | Tol   | 375                                    | 0.02                               | 25            | 81%              | 90 min |
| 0.70                   | 20%        | 0.3          | 15.75                 | MeCN  | 375                                    | 0.02                               | 25            | 2%               | 90 min |
| 0.70                   | 20%        | 0.3          | 15.75                 | MeCN  | 375                                    | 0.02                               | 25            | 28%              | 90 min |
| 0.70                   | 20%        | 0.3          | 15.75                 | MeCN  | 375                                    | 0.02                               | 25            | 3%               | 90 min |
| 0.14                   | 0%         | 0.3          | 3.15                  | Tol   | 75                                     | 0.02                               | 5             | 13% ( <i>R</i> ) | 17 h   |
| 0.14                   | 0%         | 0.3          | 3.15                  | Tol   | 75                                     | 0.02                               | 5             | 15% ( <i>R</i> ) | 17 h   |
| 0.14                   | 0%         | 0.3          | 3.15                  | Tol   | 75                                     | 0.02                               | 5             | 3%               | 17 h   |
| 0.14                   | 0%         | 0.3          | 3.15                  | MeCN  | 75                                     | 0.02                               | 5             | 5%               | 17 h   |
| 0.14                   | 0%         | 0.3          | 3.15                  | MeCN  | 75                                     | 0.02                               | 5             | 5%               | 17 h   |
| 0.14                   | 0%         | 0.3          | 3.15                  | MeCN  | 75                                     | 0.02                               | 5             | 5%               | 17 h   |

<sup>4</sup> HPLC (retention time, min): 12.7, 18.6 (Figure S13).

## 2. Experimental Section

### 2.1. General Information

#### 2.1.1. Materials

All chemicals were obtained from commercial sources and used without further purification

- **Carl Roth:** Sodium chloride (>99.8%)
- **BLDPharm:** (*RS*)-2-Aminobutyramide hydrochloride (95%)<sup>5</sup>, (*S*)-2-Aminobutyramide hydrochloride (98%), (*RS*)-Phenylglycine (97%)
- **Fluorochem Ltd.:** (*RS*)-2-Aminobutyramide hydrochloride<sup>6</sup>
- **Sigma-Aldrich:** DBU (98%)<sup>7</sup>, N-Methylmorpholine (99%)<sup>5</sup>, o-Tolualdehyde (97%)<sup>6</sup>
- **TCI Chemicals:** Benzaldehyde (>98%), DBU (98%)<sup>8</sup>, 2-Methylbenzaldehyde (98%), N-Methylmorpholine (>99%)<sup>6</sup>, (*S*)-Phenylglycine (98%), o-Tolualdehyde (98%)<sup>5</sup>
- **Thermo Fisher Scientific:** Ammonia solution (28% NH<sub>3</sub> in H<sub>2</sub>O), Thionyl chloride (99.7%),
- **VWR:** Acetonitrile, Dichloromethane, Diethyl ether, *n*-Hexane, Methanol, Toluene

#### 2.1.2. Devices

**X-ray powder diffraction (XRPD)** measurements were carried out using a Bruker D8 Advance diffractometer equipped with a Cu-K $\alpha$  radiation source ( $\lambda = 1.5406 \text{ \AA}$ ), operating at 40 kV and 30 mA. Data were collected over a  $2\theta$  range of 5–40°, with a step size of 0.02° and a total acquisition time of three minutes.

**<sup>1</sup>H-Nuclear Magnetic Resonance (<sup>1</sup>H-NMR)** spectra were recorded on a Jeol JNM-ECZL400 R series spectrometer operating at 400 MHz. Spectra were acquired in DMSO-d<sub>6</sub>, using the residual solvent signals as internal references. Chemical shifts and multiplicities are reported as follows: s = singlet, t = triplet, dd = doublet of doublets, td = triplet of doublets and m = multiplet.

**Chiral High-Performance Liquid Chromatography (cHPLC)** analyses were performed on a Waters ARC HPLC system using various columns, depending on the compound, including Daicel Chiralpak IA and Chiralcel OJ-H (5  $\mu\text{m}$ , 4.6  $\times$  250 mm). The mobile phase consisted of different solvent mixtures, such as isohexane (A), 2-propanol (B), and ethanol (C), with solvent ratios optimized for each analyte. Detection was achieved using a Waters PDA 2998 detector set at 230 nm. The chromatographic conditions for each compound are summarized as follows:

- **Compound 1:** Chiralcel OJ-H; mobile phase: isocratic 80% A / 20% C for 30 min at 1 mL·min<sup>-1</sup>; injection volume: 5  $\mu\text{L}$ .
- **Compound 2:** Chiralpak IA; mobile phase: isocratic 90% A / 10% B for 15 min at 1 mL·min<sup>-1</sup>; injection volume: 5  $\mu\text{L}$ .
- **Compound 3:** Chiralpak IA; mobile phase: isocratic 95% A / 5% B for 15 min at 1 mL·min<sup>-1</sup>; injection volume: 5  $\mu\text{L}$ .

**Ball milling** experiments were conducted using a Retsch Mixer Mill MM400.

**Resonant acoustic mixing (RAM)** experiments were performed with a LabRAM I instrument from Resodyn Acoustic Mixers.

---

<sup>5</sup> For MCDR-BM

<sup>6</sup> For MCDR-RAM

<sup>7</sup> For compounds **2** and **3**.

<sup>8</sup> For compound **1**

## 2.2. Experimental Protocols

### 2.2.1. Preparation of Enantioenriched (ee = 20%) Starting Materials

For each system, the racemic and enantiopure powders are mixed in such proportions that a mixture with 20% ee is obtained. To homogenise the powder, it is dissolved either in DCM (compound **1**) or in methanol (compounds **2** and **3**) and then evaporated under reduced pressure (= 1 batch).

The batches differ slightly in reactivity due to differences in powder properties such as particle size distribution. This latter is crystallization dependent and can be challenging to replicate exactly. Properties such as particle size directly impact the deracemisation kinetics. Therefore, all MCDR-BM experiments were performed with powder from the same batch, while all MCDR-RAM experiments were performed with powder from a second batch (**Figure S8**, **Figure S9**, **Figure S10**, **Figure S16**, **Figure S17**, **Figure S20**, **Figure S23**)

### 2.2.2. Synthesis of Starting Materials

#### 2.2.2.1. Synthesis of Compound 1

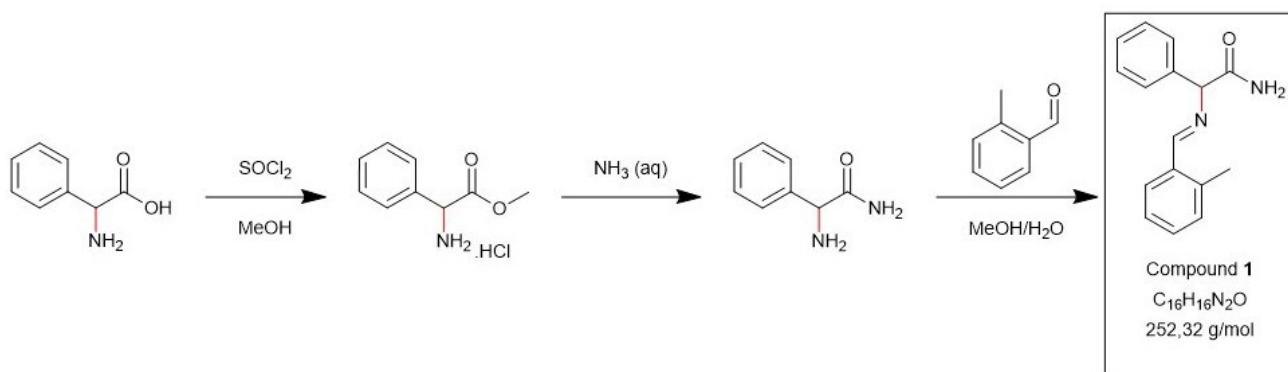

**Scheme S1:** Synthesis of compound **1** (racemic and enantiopure).

**(R,S)-N-(2-methylbenzylidene)-phenylglycine amide [(R,S)-1]:** [General procedure for **1**, based on previously reported in literature]<sup>1</sup> (R,S)-Phenylglycine (10.18 g, 67.34 mmol, 1.0 equiv.) was dissolved in methanol (60 mL), after which the solution was cooled to 0 °C. Thionyl chloride (5.6 mL, 79.09 mmol, 1.2 equiv.) was added dropwise under stirring. The reaction mixture was stirred for 18 h while gradually warming to room temperature (20 °C), then heated to reflux for 1 h, before being allowed to cool again to 20 °C. The volume was reduced by ~1/3 after which diethyl ether (100 mL) was added to induce precipitation of the product. This was collected by filtration, affording 12.18 g of crude intermediate. The crude white solid was redissolved in aqueous ammonia (75 mL, 28% NH<sub>3</sub>) and stirred at 20 °C for 22 h. The precipitate obtained was filtered, washed with cold water, and dried to afford the second intermediate product (5.58 g) without further purification. The second intermediate was then dissolved in a methanol/water mixture (30 mL, 2:1, v/v). 2-Methylbenzaldehyde (4.3 mL, 38.86 mmol, 1.0 equiv.) was added dropwise, and the reaction was stirred for 24 h at 20 °C, during which a precipitate gradually formed. The solid was isolated by filtration, washed sequentially with methanol/water (10 mL, 2:1, v/v) and methanol (6 mL), then dried under vacuum to yield a white powder (7.39 g, 29.27 mmol, 43 % overall yield). **<sup>1</sup>H-NMR** (400 MHz, DMSO-d<sub>6</sub>) δ 8.72 (s, 1H), 8.03 (dd, *J* = 7.7, 1.5 Hz, 1H), 7.51 – 7.42 (m, 2H), 7.41 – 7.29 (m, 5H), 7.32 – 7.20 (m, 3H), 4.99 (s, 1H), 2.49 (s, 3H) (**Figure S2**). **XRPD** The experimental diffraction pattern is similar to the simulated one (**Figure S8**). **HPLC** (retention time, min.): 12.7, 18.6 (**Figure S14**).

**(S)-1:** According to the general procedure, starting from enantiopure (S)-phenylglycine, instead of the racemic phenylglycine: A white powder was obtained (5.58 g, 22.10 mmol, 33% overall yield). **<sup>1</sup>H-NMR** (400 MHz, DMSO-d<sub>6</sub>) δ 8.72 (s, 1H), 8.03 (dd, *J* = 7.8, 1.6 Hz, 1H), 7.50 – 7.43 (m, 2H), 7.41 – 7.31 (m, 5H), 7.31 – 7.21 (m, 3H), 4.99

(s, 1H), 2.50 (s, 3H) (**Figure S3**). **XRPD** The experimental diffraction pattern is similar to the simulated one (**Figure S8**). **HPLC** (retention time, min.): 18.5 (**Figure S15**).

### 2.2.2.2. Synthesis of Compounds 2 and 3

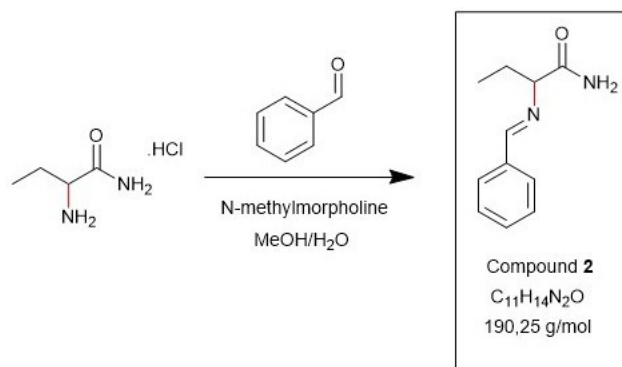

**Scheme S2:** Synthesis of compound **2** (racemic and enantiopure).

**(R,S)-2-((benzylidene)amino)butanamide [(R,S)-2]:** [General procedure for compounds **2** and **3**, based on previously reported in literature]<sup>2</sup> A solution of *(R,S)*-2-aminobutanamide hydrochloride (5.00 g, 36.1 mmol, 1.0 equiv.) was prepared in a 1:1 methanol–water mixture (total volume of 20 mL) at room temperature. *N*-Methylmorpholine (4.40 mL, 39.7 mmol, 1.1 equiv.) was added to this solution, followed by the dropwise addition of benzaldehyde (3.70 mL, 36.1 mmol, 1.0 equiv.), previously dissolved in methanol (5 mL). The mixture was stirred for 1 h, after which 20 mL of water was slowly added, and stirring was continued for an additional hour. The precipitated solid was collected by filtration, washed with a 1:1 (v/v) methanol–water mixture (10 mL), and dried under reduced pressure to yield a white crystalline powder (3.77 g, 19.8 mmol, 55%). This powder was then recrystallized twice in hot MeCN (4 mL/g of *(R,S)*-**2**) with a real yield of 80%. Note that a hot filtration could be necessary if impurities don't dissolve in hot MeCN. **<sup>1</sup>H-NMR** (400 MHz, DMSO- *d*<sub>6</sub>) δ 8.32 (s, 1H), 7.89 – 7.79 (m, 2H), 7.53 – 7.42 (m, 3H), 7.16 (s, 1H), 7.11 (s, 1H), 3.64 (dd, 1H), 1.98 – 1.75 (m, 1H), 1.75 – 1.57 (m, 1H), 0.81 (t, 3H) (**Figure S4**). **XRPD** The experimental diffraction pattern is similar to the simulated one (**Figure S9**). **HPLC** (retention time, min.): 7.6, 10.5 (**Figure S20**).

**(S)-2:** According to the general procedure, starting from enantiopure (*S*)-2-aminobutanamide hydrochloride instead, of the racemic 2-aminobutanamide hydrochloride: A white powder was obtained (5.05 g, 26.5 mmol, 74%). The final recrystallization occurred by doubling the amount of MeCN (8 mL/g of (*S*)-**2**). **<sup>1</sup>H-NMR** (400 MHz, DMSO- *d*<sub>6</sub>) δ 8.33 (s, 1H), 7.90–7.78 (m, 2H), 7.55 – 7.40 (m, 3H), 7.17 (s, 1H), 7.12 (s, 1H), 3.65 (dd, 1H), 1.93 – 1.79 (m, 1H), 1.72 – 1.59 (m, 1H), 0.81 (t, 3H) (**Figure S5**). **XRPD** The experimental diffraction pattern is similar to the simulated one (**Figure S9**). **HPLC** (retention time, min.): 7.7 (**Figure S21**).

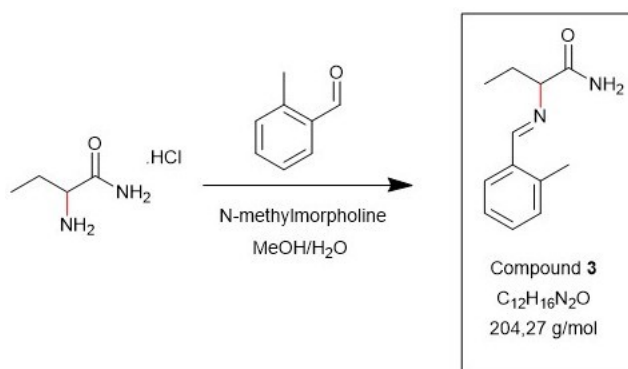

**Scheme S3:** Synthesis of compound **3** (racemic and enantiopure).

**(R,S)-2-[(2-methylbenzylidene)amino]butanamide [(R,S)-3]:** According to the general procedure, starting from *o*-tolualdehyde (4.20 mL, 36.3 mmol, 1.0 equiv.) instead of benzaldehyde: A white powder was obtained (5.30 g, 27.8 mmol, 77%). <sup>1</sup>H-NMR (400 MHz, DMSO- *d*<sub>6</sub>) δ 8.58 (s, 1H), 7.92 (dd, 1H), 7.35 (td, 1H), 7.29 – 7.21 (m, 2H), 7.17 (s, 1H), 7.05 (s, 1H), 3.67 (dd, 1H), 2.49 (s, 3H), 1.93 – 1.75 (m, 1H), 1.78 – 1.60 (m, 1H), 0.82 (t, 3H) (**Figure S6**). **XRPD** The experimental diffraction pattern is similar to the simulated one (**Figure S10**). **HPLC** (retention time, min.): 11.5, 12.6 (**Figure S23**).

**(R,S)-3:** According to the general procedure, starting from enantiopure (*S*)-2-aminobutyramide hydrochloride instead of the racemic one and from *o*-tolualdehyde (4.20 mL, 36.3 mmol, 1.0 equiv.) instead of benzaldehyde: A white powder was obtained (5.80 g, 30.5 mmol, 85%). The final recrystallization occurred by doubling the amount of MeCN (8 mL/g of (*S*)-3). <sup>1</sup>H-NMR (400 MHz, DMSO- *d*<sub>6</sub>) δ 8.58 (s, 1H), 7.92 (dd, 1H), 7.35 (td, 1H), 7.29 – 7.23 (m, 2H), 7.16 (s, 1H), 7.05 (s, 1H), 3.67 (dd, 1H), 2.49 (s, 3H), 1.94 – 1.77 (m, 1H), 1.75 – 1.59 (m, 1H), 0.82 (t, 3H) (**Figure S7**). **XRPD** The experimental diffraction pattern is similar to the simulated one (**Figure S10**). **HPLC** (retention time, min.): 11.7 (**Figure S24**).

### 2.2.3. Mechanochemical Deracemization (MCDR)

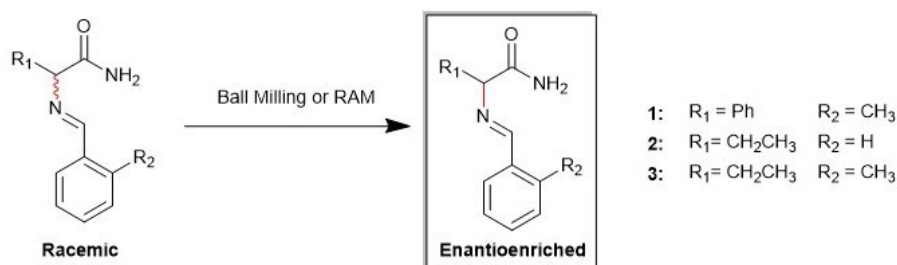

**Scheme S4:** Deracemization of imines.

#### 2.2.3.1. MCDR by Ball-Milling (MCDR-BM)

##### In ZrO<sub>2</sub> jar

**Compound 1:** [General procedure based on previously reported in literature]<sup>3</sup> A 10 mL ZrO<sub>2</sub> milling jar was charged sequentially with compound **1** (0.200 g, 0.793 mmol, 1.00 equiv.), NaCl (4.5 g) as a bulk material, two ZrO<sub>2</sub> balls (10 mm diameter), DBU (78.0 μL, 0.523 mmol, 0.66 equiv.), and the LAG-additive (for η = 0.023 μL/mg: 108 μL; for η = 0.21 μL/mg: 1.000 μL). The mixture was milled at 30 Hz for 1.5 h<sup>9</sup>. After milling, the solid was suspended in approximately 25 mL of water and filtered to remove NaCl, DBU, and LAG. The final product was obtained as a white powder and was analysed by cHPLC to determine the final ee. cHPLC conditions are described in section 2.1.2.

**Compound 2:** According to the general procedure, starting from compound **2** (0.200 g, 1.05 mmol, 1.00 equiv.) and DBU (47.2 μL, 0.315 mmol, 0.30 equiv.). The crude product was dissolved in MeOH and the solvent was removed under reduced pressure.

**Compound 3:** According to the general procedure, starting from compound **3** (0.200 g, 0.979 mmol, 1.00 equiv.) and DBU (43.8 μL, 0.294 mmol, 0.30 equiv.). The crude product was dissolved in MeOH and the solvent was removed under reduced pressure.

<sup>9</sup> 90 min when the initial ee = 20%. When the starting material is racemic, the time of reaction is specified in the main paper

**In PTFE jar**

**Compound 1:** According to the general procedure, in a 14 mL PTFE milling jar charged with compound **1** (0.280 g, 1.11 mmol, 1.00 equiv.), NaCl (6.3 g), three ZrO<sub>2</sub> balls, DBU (109.2  $\mu$ L, 0.732 mmol, 0.66 equiv.), and the LAG solvent (for  $\eta = 0.023$   $\mu$ L/mg: 150  $\mu$ L; for  $\eta = 0.21$   $\mu$ L/mg: 1400  $\mu$ L).

**Compound 2:** According to the general procedure, in a 14 mL PTFE milling jar charged with compound **2** (0.280 g, 1.47 mmol, 1.00 equiv.), NaCl (6.3 g), three ZrO<sub>2</sub> balls, DBU (66.0  $\mu$ L, 0.442 mmol, 0.30 equiv.), and the LAG solvent (for  $\eta = 0.023$   $\mu$ L/mg: 150  $\mu$ L; for  $\eta = 0.21$   $\mu$ L/mg: 1400  $\mu$ L). The crude product was dissolved in MeOH and the solvent was removed under reduced pressure.

**Compound 3:** According to the general procedure, in a 14 mL PTFE milling jar charged with compound **3** (0.280 g, 1.37 mmol, 1.00 equiv.), NaCl (6.3 g), three ZrO<sub>2</sub> balls, DBU (61.4  $\mu$ L, 0.411 mmol, 0.30 equiv.), and the LAG solvent (for  $\eta = 0.023$   $\mu$ L/mg: 150  $\mu$ L; for  $\eta = 0.21$   $\mu$ L/mg: 1400  $\mu$ L). The crude product was dissolved in MeOH and the solvent was removed under reduced pressure.

**2.2.3.1. MCDR by Resonant Acoustic Mixing (MCDR-RAM)****In 5 mL glass vial**

**Compound 1:** [General procedure] A 5 mL glass vial was charged sequentially with compound **1** (0.140 g, 0.555 mmol, 1.00 equiv.), NaCl (3.15 g) as a bulk material, DBU (54.8  $\mu$ L, 0.366 mmol, 0.66 equiv.), and the LARAM-additive (for  $\eta = 0.023$   $\mu$ L/mg: 75  $\mu$ L; for  $\eta = 0.21$   $\mu$ L/mg: 700  $\mu$ L). The mixture was accelerated at 100 g for 1.5 h.<sup>10</sup> After mixing, the solid was suspended in approximately 25 mL of water and filtered to remove NaCl, DBU, and LARAM-additive. The final product was obtained as a white powder and was analysed by chPLC to determine the final ee. chPLC conditions is described in section 2.1.2.

**Compound 2:** According to the general procedure, starting from compound **2** (0.140 g, 0.736 mmol, 1.00 equiv.) and DBU (33.0  $\mu$ L, 0.221 mmol, 0.30 equiv.).

**Compound 3:** According to the general procedure, starting from compound **3** (0.140 g, 0.685 mmol, 1.00 equiv.) and DBU (30.8  $\mu$ L, 0.206 mmol, 0.30 equiv.).

**In 25 mL vial**

**Compound 1:** According to the general procedure, in a 25 mL vial charged with compound **1** (0.700 g, 2.77 mmol, 1.00 equiv.), NaCl (15.75 g), DBU (273.8  $\mu$ L, 1.83 mmol, 0.66 equiv.), and the LARAM solvent (375  $\mu$ L).

**Compound 2:** According to the general procedure, in a 25 mL vial charged with compound **2** (0.700 g, 3.68 mmol, 1.00 equiv.), NaCl (15.75 g), DBU (165.2  $\mu$ L, 1.10 mmol, 0.30 equiv.), and the LARAM solvent (375  $\mu$ L).

**Compound 3:** According to the general procedure in a 25 mL vial charged with compound **3** (0.700 g, 3.43 mmol, 1.00 equiv.), NaCl (15.75 g), DBU (153.8  $\mu$ L, 1.03 mmol, 0.30 equiv.), and the LARAM solvent (375  $\mu$ L).

---

<sup>10</sup> 90 min when the initial ee = 20%. When the starting material is racemic, the time of reaction is 17h

### 3. Characterization

#### 3.1. $^1\text{H-NMR}$ -Spectra

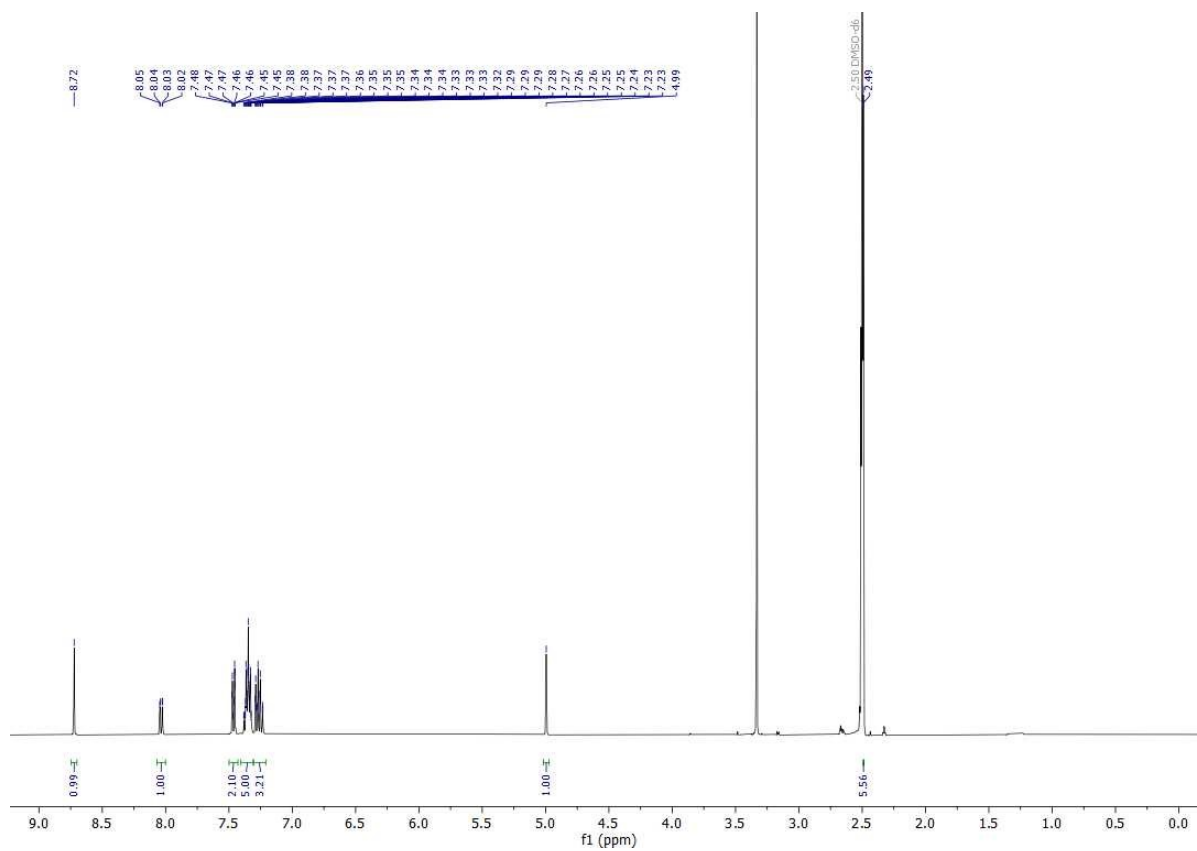

Figure S2:  $^1\text{H-NMR}$  spectrum in  $\text{DMSO-d}_6$  of  $(R,S)$ -1.

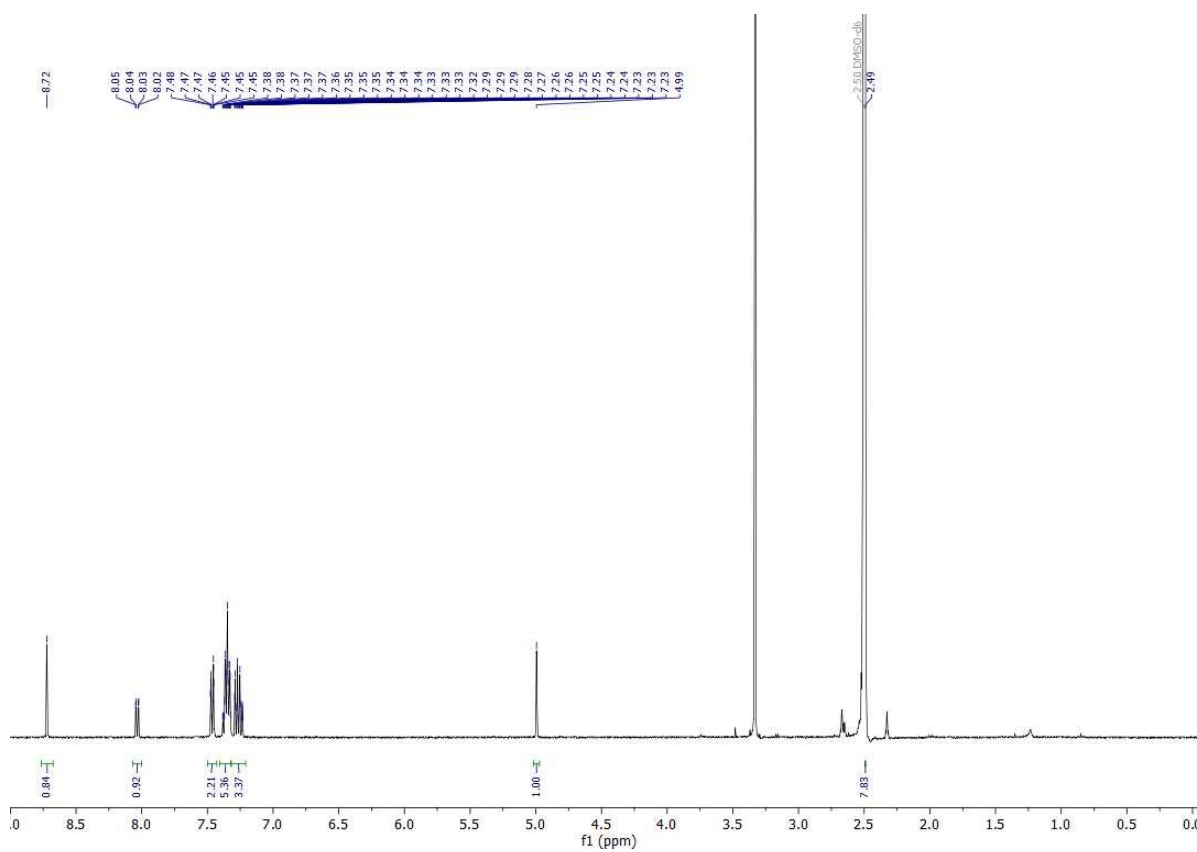

Figure S3:  $^1\text{H-NMR}$  spectrum in  $\text{DMSO-d}_6$  of  $(S)$ -1.



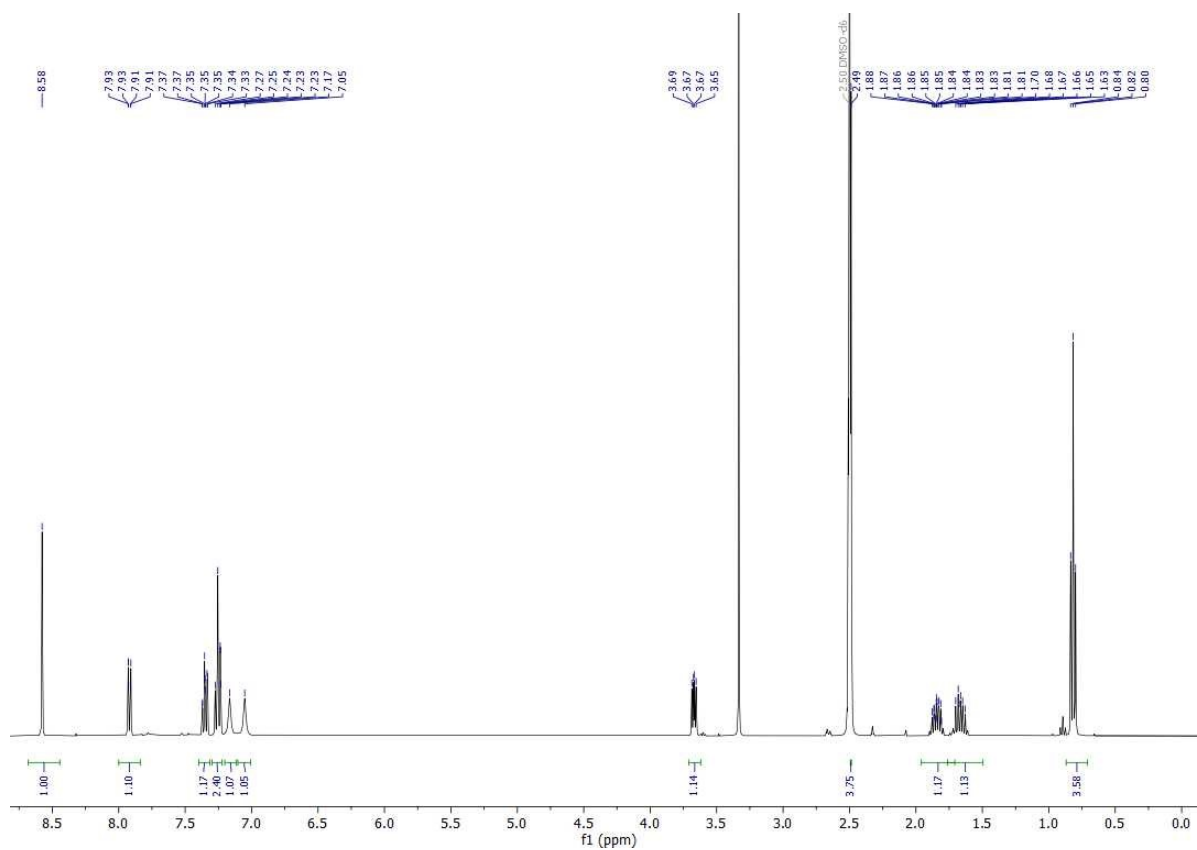Figure S6:  $^1\text{H-NMR}$  spectrum in  $\text{DMSO-d}_6$  of  $(R,S)$ -3.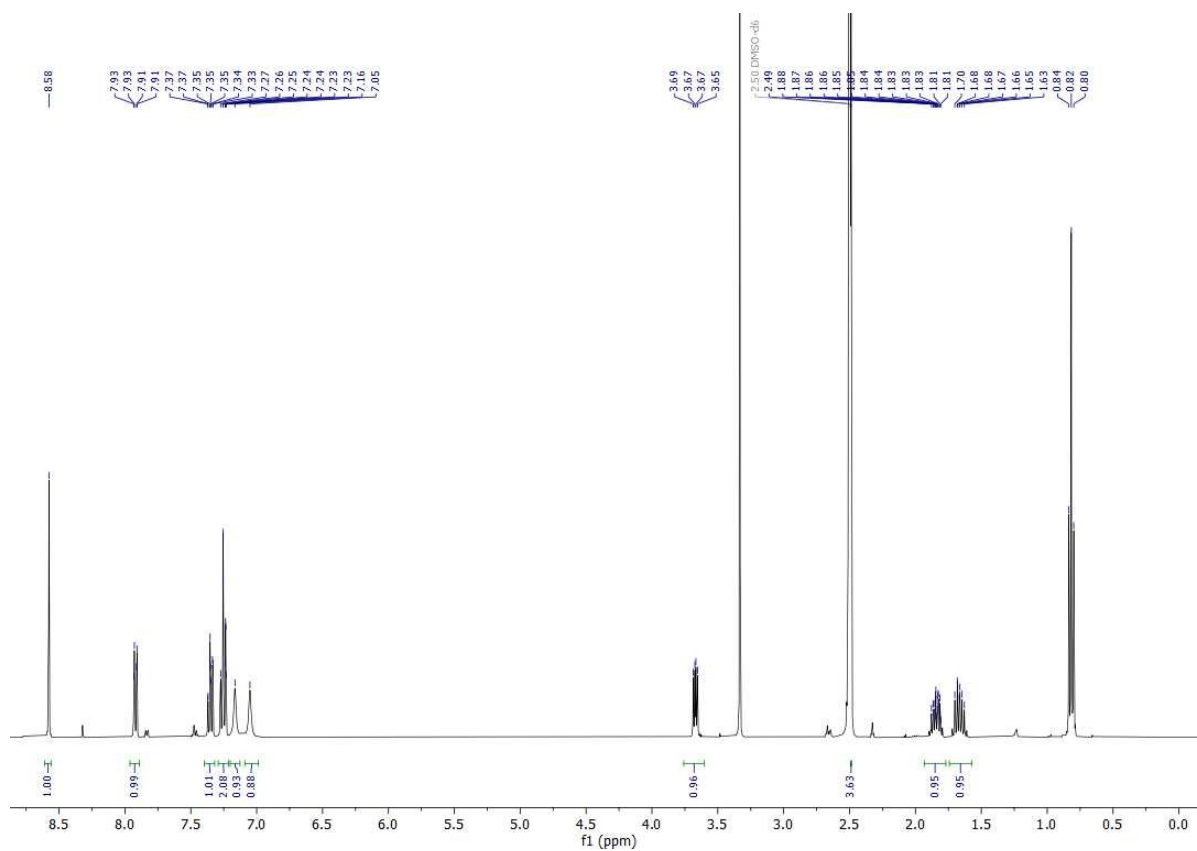Figure S7:  $^1\text{H-NMR}$  spectrum in  $\text{DMSO-d}_6$  of  $(S)$ -3.

### 3.2. XRPD Analysis

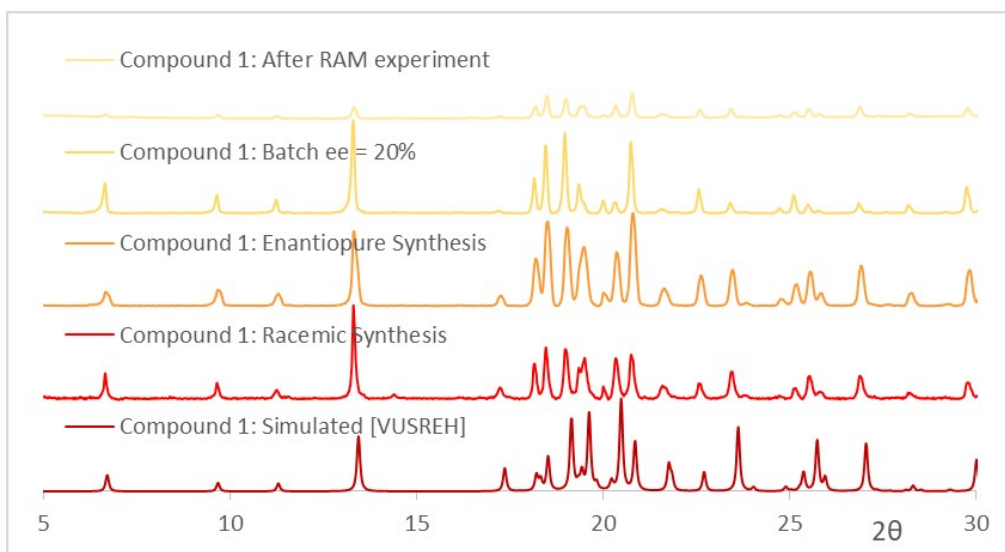

**Figure S8:** Experimental and simulated diffraction patterns of compound 1. CCDC code in parentheses.

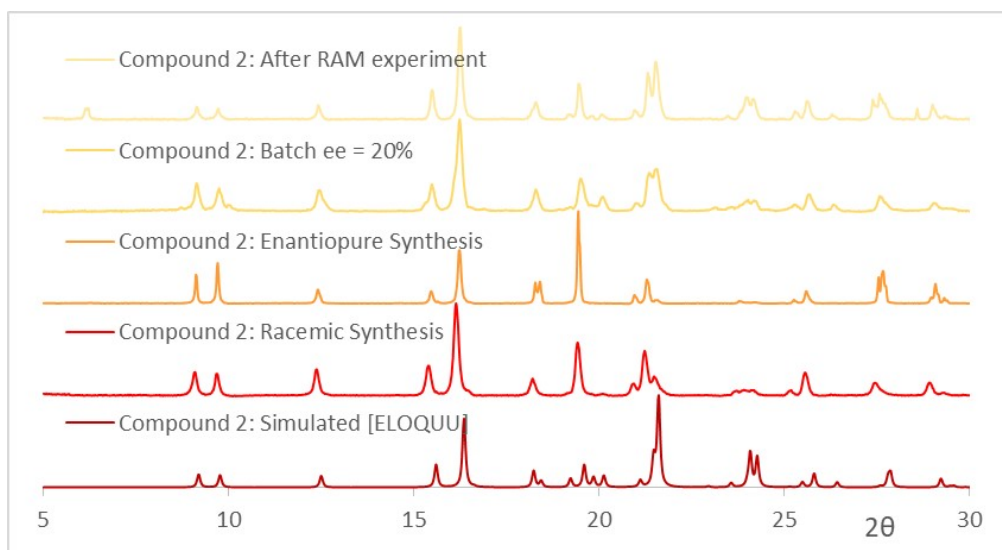

**Figure S9:** Experimental and simulated diffraction patterns of compound 2. CCDC code in parentheses.

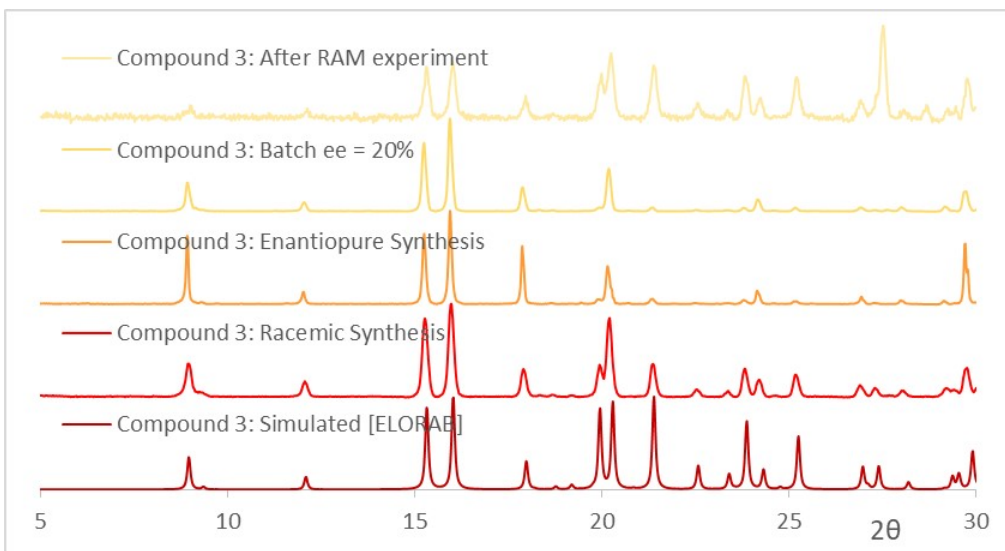

**Figure S10:** Experimental and simulated diffraction patterns of compound 3. CCDC code in parentheses.

### 3.3. HPLC Analysis

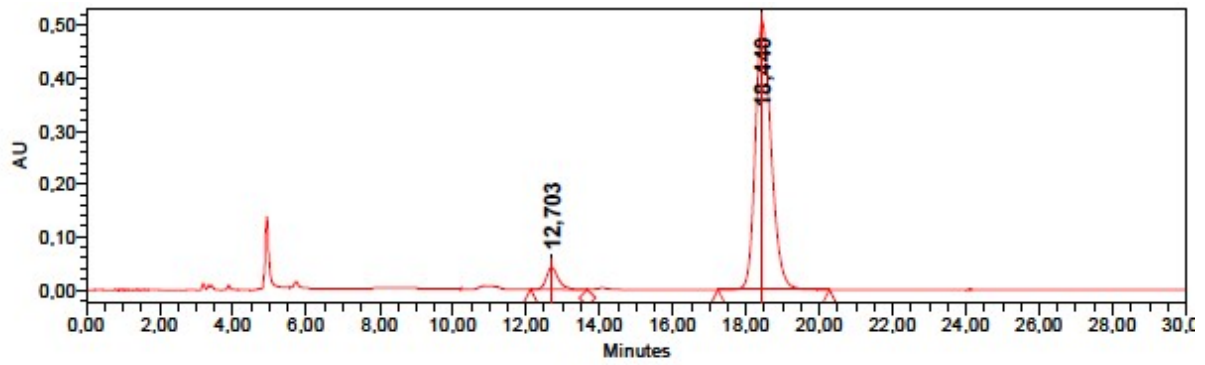

Peak Results

| Name | RT     | Area     | % Area |
|------|--------|----------|--------|
| 1    | 12,703 | 932581   | 5,73   |
| 2    | 18,440 | 15331623 | 94,27  |

Figure S11: HPLC analysis of compound 1 after RAM, in 25 mL vials, with toluene.

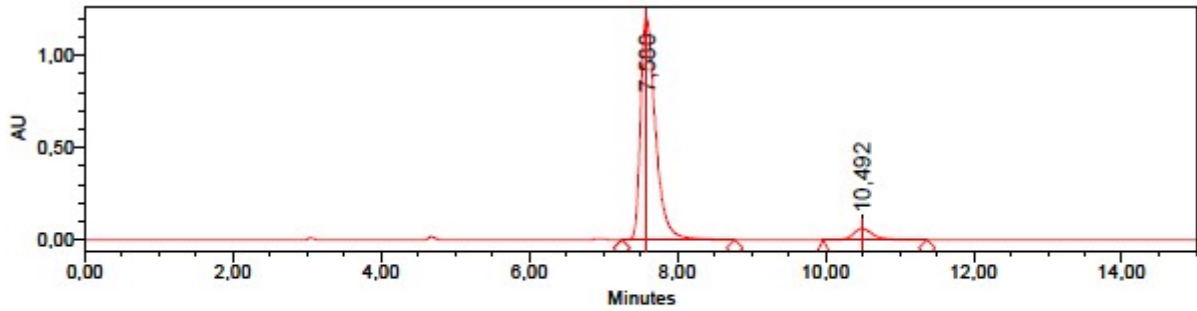

Peak Results

| Name | RT     | Area     | % Area |
|------|--------|----------|--------|
| 1    | 7,580  | 16831300 | 93,80  |
| 2    | 10,492 | 1111942  | 6,20   |

Figure S12: HPLC analysis of compound 2 after RAM, in 25 mL vials, with toluene.

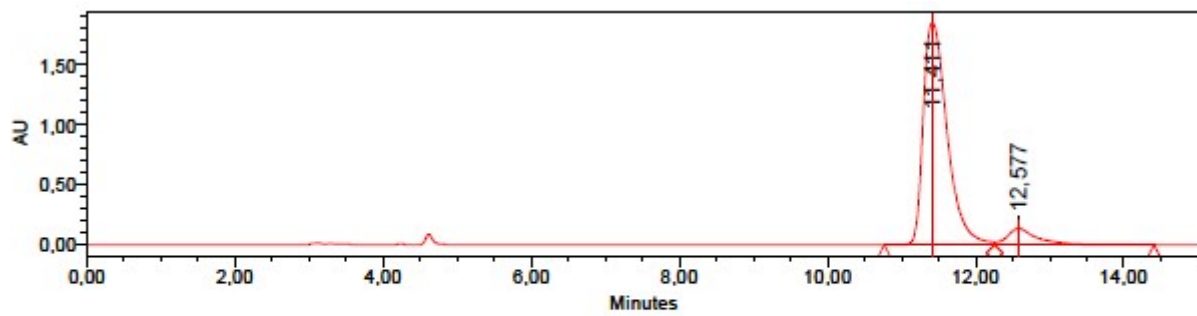

Peak Results

| Name | RT     | Area     | % Area |
|------|--------|----------|--------|
| 1    | 11,411 | 41482196 | 91,68  |
| 2    | 12,577 | 3764874  | 8,32   |

Figure S13: HPLC analysis of compound 3 after RAM, in 25 mL vials, with toluene.

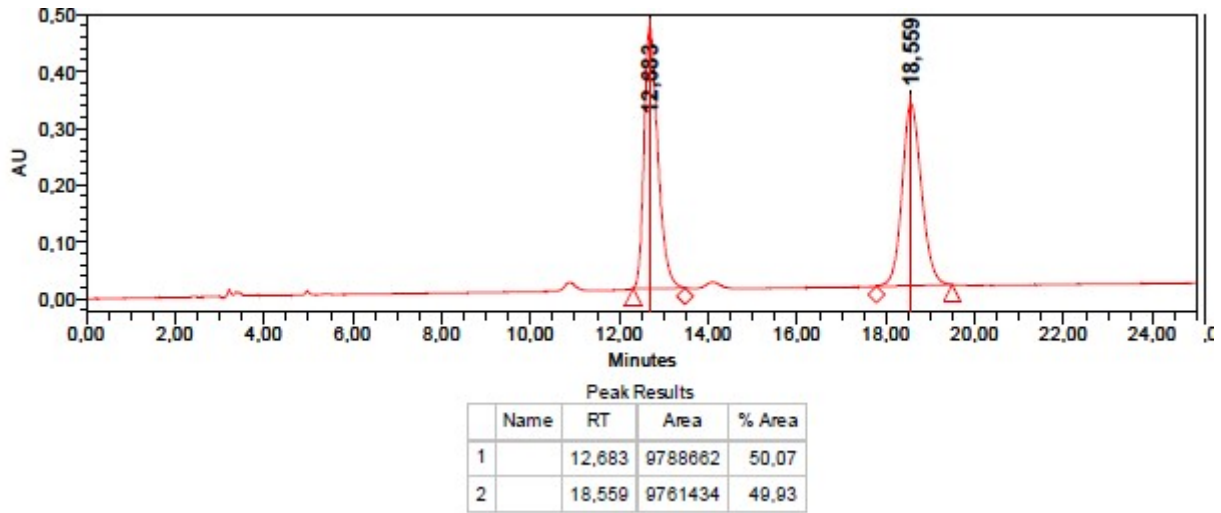

Figure S14: HPLC analysis of synthesized (R,S)-1.

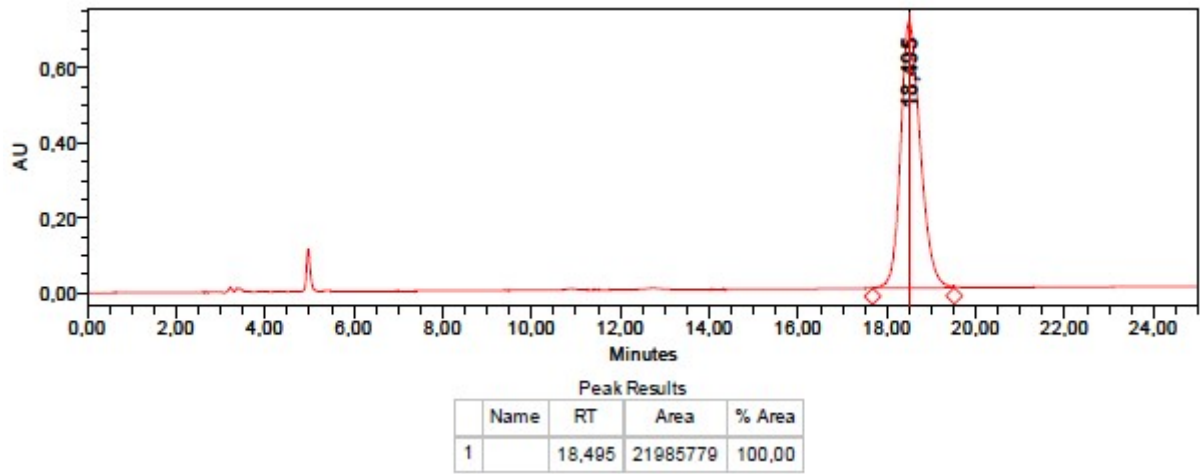

Figure S15: HPLC analysis of synthesized (S)-1.

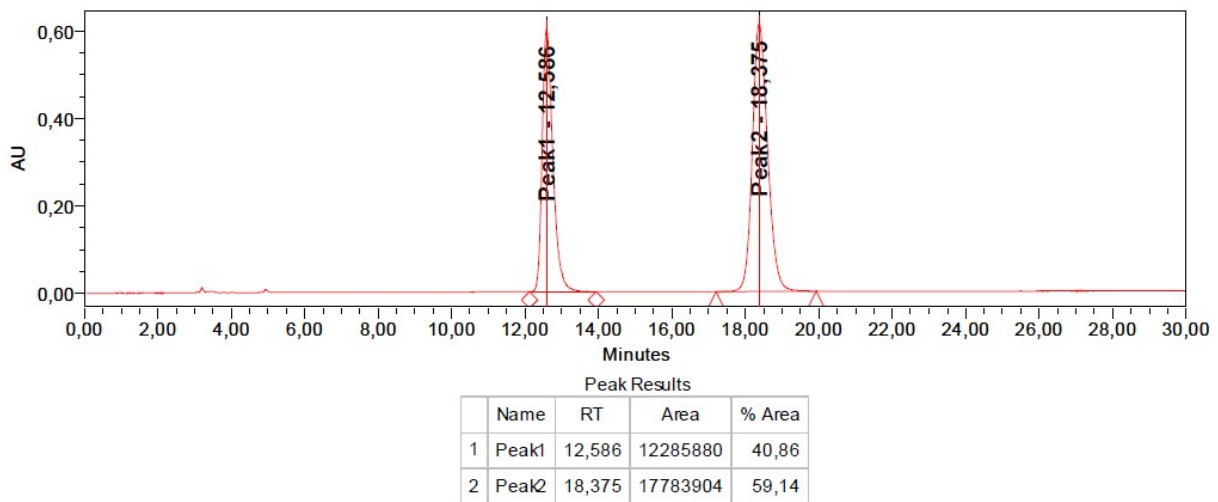

Figure S16: HPLC analysis of the 20% ee -batch of compound 1.

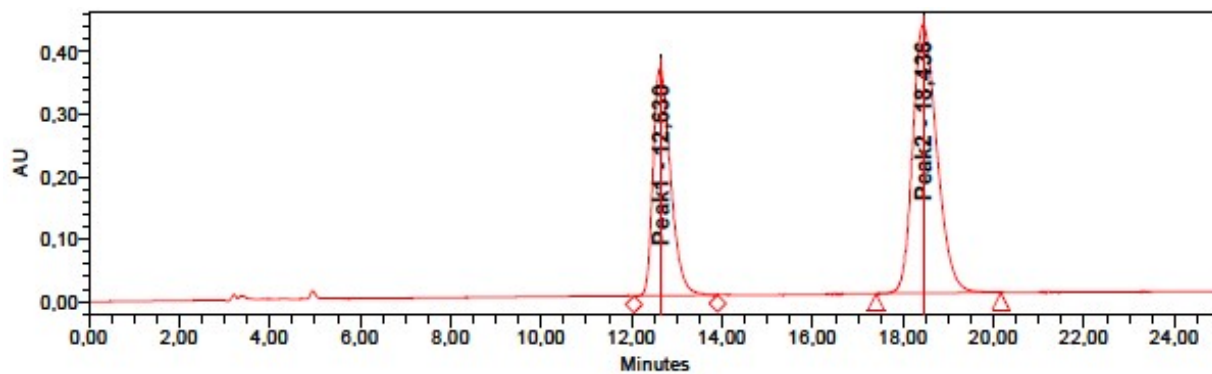

| Peak Results |        |          |        |
|--------------|--------|----------|--------|
| Name         | RT     | Area     | % Area |
| 1 Peak1      | 12,630 | 9623062  | 37,58  |
| 2 Peak2      | 18,436 | 15986338 | 62,42  |

Figure S17: HPLC analysis of the 25% ee -batch of compound 1.

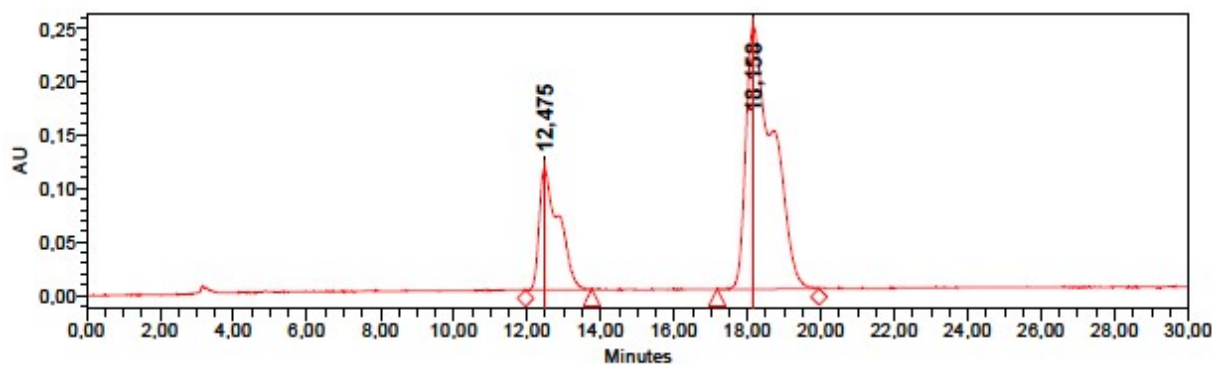

| Peak Results |        |          |        |
|--------------|--------|----------|--------|
| Name         | RT     | Area     | % Area |
| 1            | 12,475 | 4171495  | 24,75  |
| 2            | 18,158 | 12682877 | 75,25  |

Figure S18: HPLC analysis of the 50% ee -batch of compound 1.

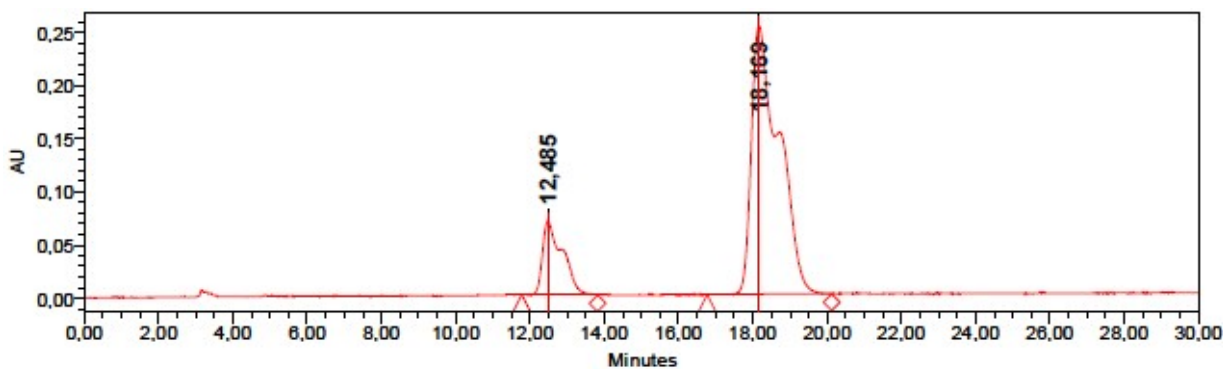

| Peak Results |        |          |        |
|--------------|--------|----------|--------|
| Name         | RT     | Area     | % Area |
| 1            | 12,485 | 2551937  | 16,33  |
| 2            | 18,169 | 13072580 | 83,67  |

Figure S19: HPLC analysis of the 75% ee -batch of compound 1.

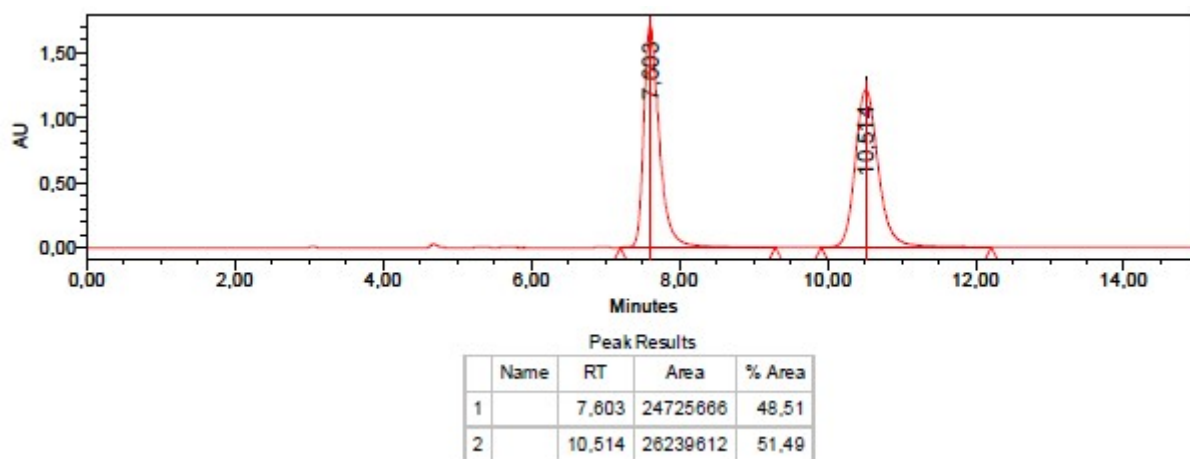

Figure S20: HPLC analysis of synthesized (R,S)-2.

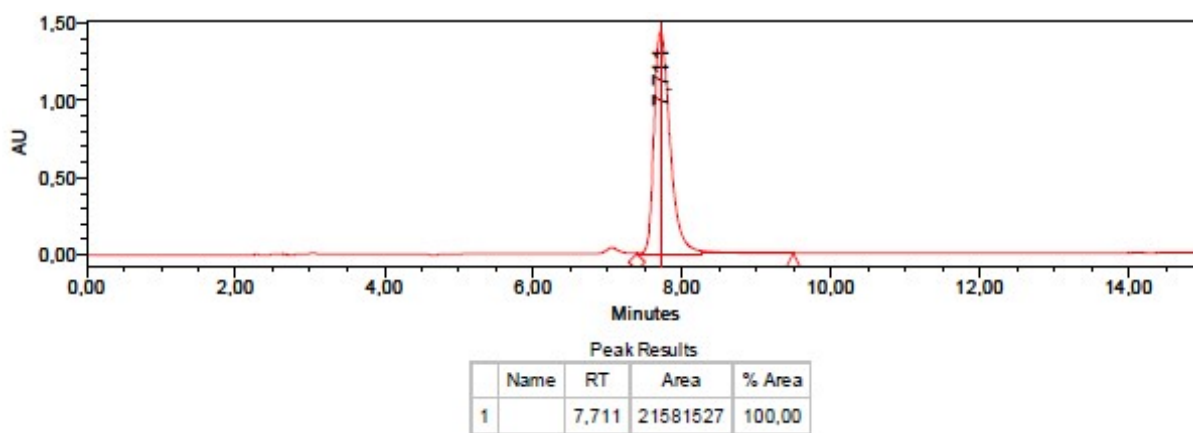

Figure S21: HPLC analysis of synthesized (S)-2.

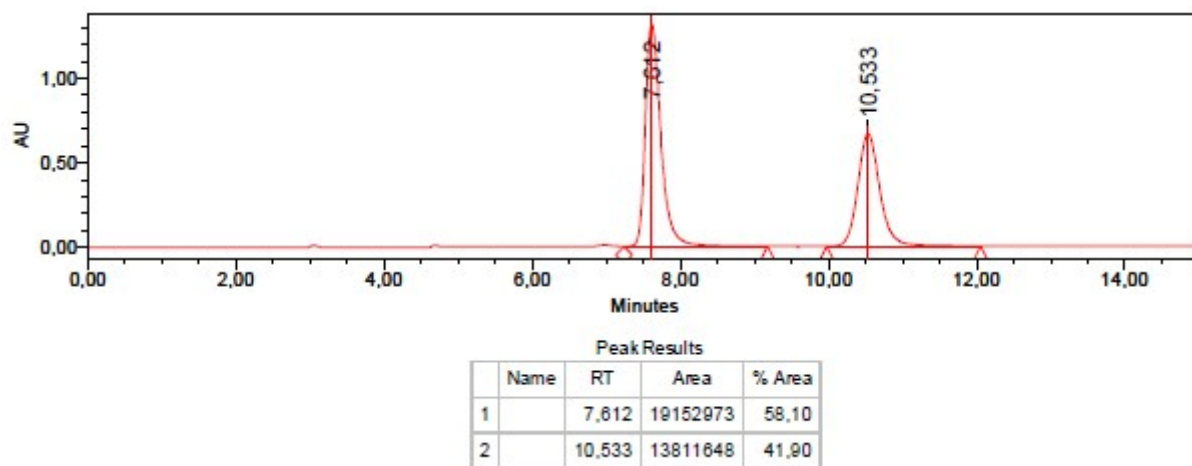

Figure S22: HPLC analysis of the 20% ee-batch of compound 2.

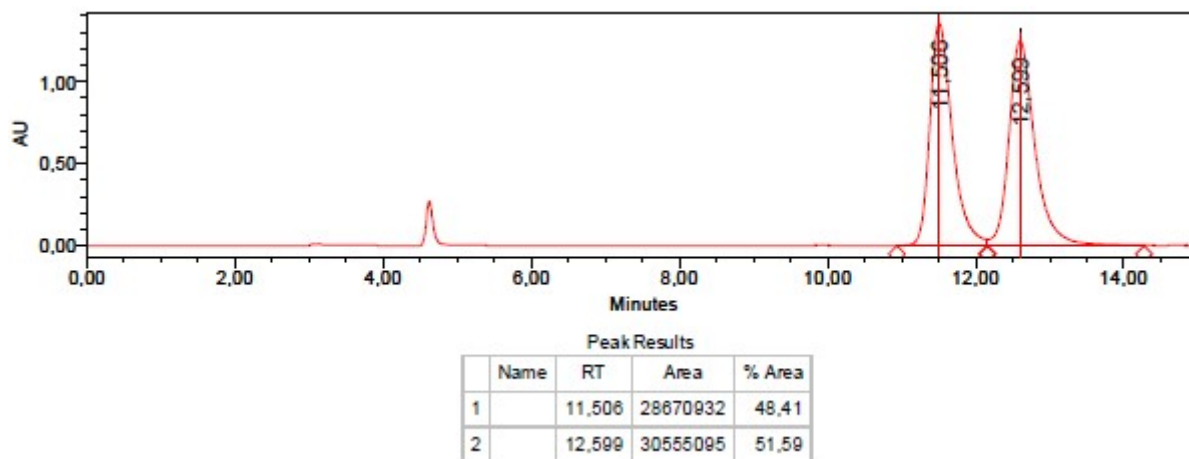

Figure S23: HPLC analysis of synthesized (R,S)-3.

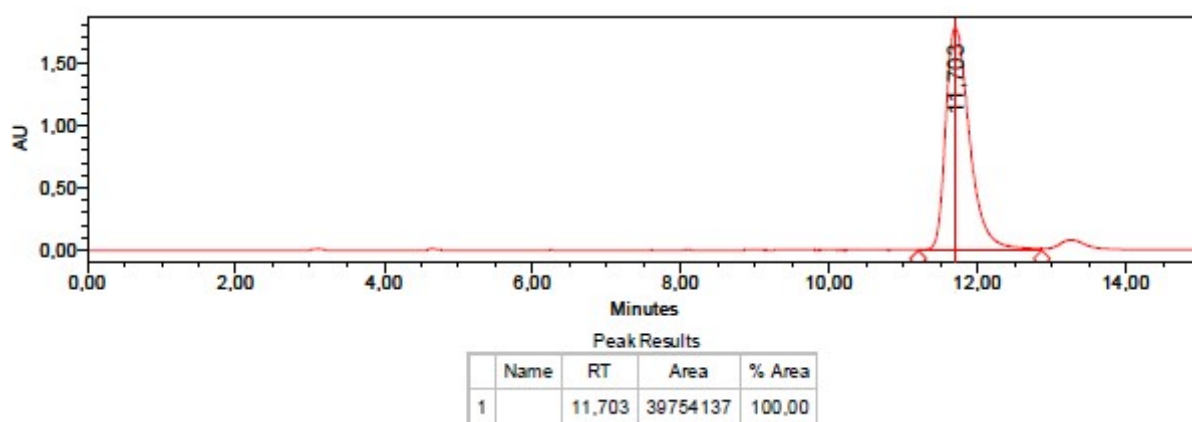

Figure S24: HPLC analysis of synthesized (S)-3.

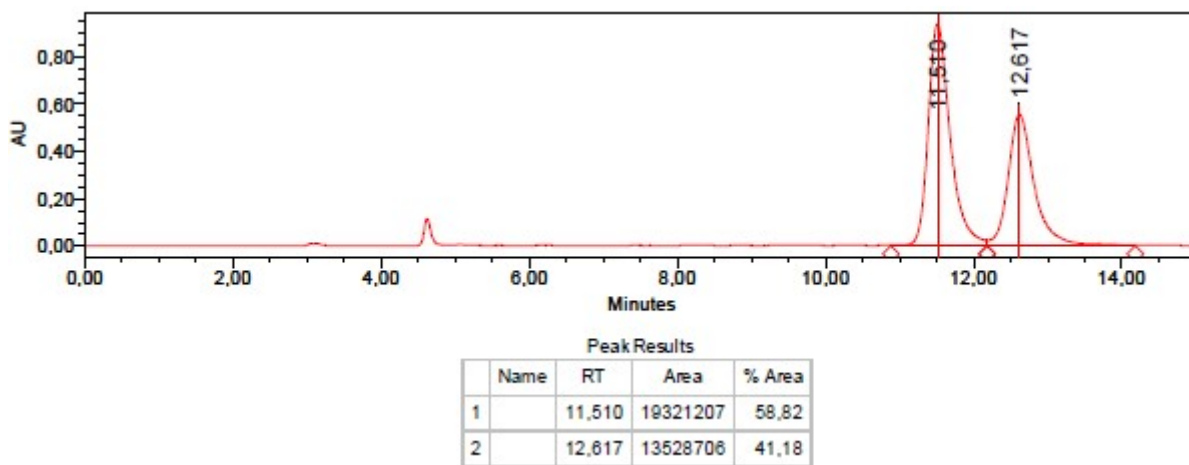

Figure S25: HPLC analysis of the 20% ee -batch of compound 3.

#### 4. References

- 1 W. L. Noorduin, T. Izumi, A. Millemaggi, M. Leeman, H. Meekes, W. J. P. Van Enckevort, R. M. Kellogg, B. Kaptein, E. Vlieg and D. G. Blackmond, *J. Am. Chem. Soc.*, 2008, **130**, 1158–1159.
- 2 I. Baglai, M. Leeman, R. M. Kellogg and W. L. Noorduin, *Org. Biomol. Chem.*, 2018, **17**, 35–38.
- 3 J. Gieling, G. Wéry, C. Lopes, J. de Meester, C. Brandel, Y. Cartigny, T. Leyskens and D. M. Baier, *Chem. – Eur. J.*, 2025, **31**, e202404120.
